# Supplementary material
Source: PubMed Central journal article supplement (PMC3037411)
Supplement: pgen.1001296.s007.pdf [file pgen.1001296.s007.pdf]

**Table S1.** Estimates of average evolutionary divergence over sequence pairs within lineages (shaded in gray) and between lineages.

| <b>genomic dataset</b>                        |                 |                  |                  |                  |                  |
|-----------------------------------------------|-----------------|------------------|------------------|------------------|------------------|
|                                               | <b>Outgroup</b> | <b>Lineage 1</b> | <b>Lineage 2</b> | <b>Lineage 3</b> | <b>Lineage 4</b> |
| <b>Outgroup</b>                               | n.d.            |                  |                  |                  |                  |
| <b>Lineage 1</b>                              | 0.357 ± 0.0005  | n.d.             |                  |                  |                  |
| <b>Lineage 2</b>                              | 0.356 ± 0.0005  | 0.168 ± 0.0004   | n.d.             |                  |                  |
| <b>Lineage 3</b>                              | 0.363 ± 0.0005  | 0.181 ± 0.0004   | 0.171 ± 0.0004   | 0.070 ± 0.0002   |                  |
| <b>Lineage 4</b>                              | 0.353 ± 0.0005  | 0.185 ± 0.0004   | 0.175 ± 0.0004   | 0.183 ± 0.0004   | 0.121 ± 0.0003   |
| <b><i>gltA, groEL, ribE, rpoB</i> dataset</b> |                 |                  |                  |                  |                  |
|                                               | <b>Outgroup</b> | <b>Lineage 1</b> | <b>Lineage 2</b> | <b>Lineage 3</b> | <b>Lineage 4</b> |
| <b>Outgroup</b>                               | n.d.            |                  |                  |                  |                  |
| <b>Lineage 1</b>                              | 0.301 ± 0.0082  | n.d.             |                  |                  |                  |
| <b>Lineage 2</b>                              | 0.292 ± 0.0077  | 0.139 ± 0.0058   | 0.031 ± 0.0020   |                  |                  |
| <b>Lineage 3</b>                              | 0.301 ± 0.0081  | 0.145 ± 0.0064   | 0.131 ± 0.0056   | 0.061 ± 0.0033   |                  |
| <b>Lineage 4</b>                              | 0.291 ± 0.0068  | 0.157 ± 0.0055   | 0.139 ± 0.0042   | 0.145 ± 0.0049   | 0.107 ± 0.0032   |

n.d., not determined
