# Supplementary material
Source: PubMed Central journal article supplement (PMC3037411)
Supplement: pgen.1001296.s008.pdf [file pgen.1001296.s008.pdf]

**Table S2.** Genes of lineage 3 with average  $dn/ds$  values ( $\omega$ )  $\geq 0.25$  and/or site-specific positive selection detected by CodeML (model M2a vs. model M1a). Genes are ordered according to  $\omega$ . Genes with  $\omega < 0.25$ , but with sites under positive selection are indicated by gray color. *virB* T4SS and *bep* genes are indicated by orange color. Orthologous genes present in genomes of other lineages are shown. Likelihood-ratio-test (LRT) results of the CodeML selection analysis are given for comparison of model M2a vs. M1a and model M8 vs. M7.

| Gene       | Product                                        | Length (aa) <sup>a</sup> | Orthologs in other genomes <sup>3</sup> |                         |                           |                      | $\omega$          | PAML results <sup>b</sup> |           |
|------------|------------------------------------------------|--------------------------|-----------------------------------------|-------------------------|---------------------------|----------------------|-------------------|---------------------------|-----------|
|            |                                                |                          | <i>Brucella abortus</i>                 | <i>B. bacilliformis</i> | <i>B. schoenbuchensis</i> | <i>B. quintana</i>   |                   | M2a vs. M1a               | M8 vs. M7 |
| BARCL_1245 | conserved protein of unknown function          | 91                       | BruAb1_1710                             | BARBAKC583_0136         | BARSC_10259               | BQ12030              | 16.73 $\pm$ 40.3  | 0.00                      | 0.00      |
| BARCL_0768 | conserved exported protein of unknown function | 77                       | no                                      | no                      | BARSC_40129               | BQ06010              | 16.69 $\pm$ 40.32 | 0.00                      | 0.00      |
| BARCL_0782 | ATP-binding protein of ABC-transport system    | 245                      | BruAb2_0027                             | no                      | BARSC_40051               | BQ06320              | 16.56 $\pm$ 40.39 | 1.28                      | 3.00      |
| BARCL_1321 | conserved protein of unknown function          | 85                       | BruAb1_1804                             | no                      | BARSC_10329               | BQ12930              | 0.82 $\pm$ 0.22   | 1.36                      | 1.77      |
| BARCL_0240 | conserved exported protein of unknown function | 49                       | no                                      | BARBAKC583_0299         | BARSC_20051               | no                   | 0.78 $\pm$ 0.22   | 5.92                      | 5.96      |
| BARCL_0077 | VirB T4SS protein, VirB5                       | 150                      | no                                      | no                      | no                        | BQ10560 <sup>c</sup> | 0.73 $\pm$ 0.09   | 11.02**                   | 12.06**   |
| BARCL_0647 | VirB T4SS protein, VirB5                       | 150                      | no                                      | no                      | no                        | BQ10560 <sup>c</sup> | 0.73 $\pm$ 0.09   | 11.02**                   | 12.06**   |
| BARCL_1163 | conserved protein of unknown function          | 97                       | no                                      | no                      | no                        | BQ11040              | 0.65 $\pm$ 0.34   | 2.11                      | 2.27      |
| BARCL_0505 | glycine cleavage system T protein              | 373                      | BruAb2_0504                             | BARBAKC583_1096         | BARSC_40500               | BQ10130              | 0.64 $\pm$ 1.18   | 1.18                      | 1.41      |
| BARCL_0118 | VirB T4SS effector protein, Bep (fragment)     | 223                      | no                                      | no                      | no                        | BQ10650 <sup>c</sup> | 0.62 $\pm$ 0.21   | 13.84**                   | 14.52**   |
| BARCL_0960 | VirB T4SS effector protein, Bep                | 430                      | no                                      | no                      | no                        | BQ10650 <sup>c</sup> | 0.61 $\pm$ 0.18   | 11.42**                   | 14.62**   |
| BARCL_0491 | protein of unknown function                    | 120                      | no                                      | no                      | BARSC_10073               | no                   | 0.6 $\pm$ 0.09    | 0.09                      | 0.18      |
| BARCL_0416 | TonB protein                                   | 244                      | BruAb1_0622                             | BARBAKC583_0461         | BARSC_20204               | BQ04170              | 0.53 $\pm$ 0.17   | 0.37                      | 0.53      |
| BARCL_0125 | Heme exporter protein CcmD                     | 50                       | no                                      | BARBAKC583_1287         | BARSC_10492               | BQ01050              | 0.5 $\pm$ 0.34    | 0.99                      | 1.06      |
| BARCL_0194 | exported protein of unknown function           | 90                       | no                                      | no                      | no                        | no                   | 0.5 $\pm$ 0.16    | 14.42**                   | 18.29**   |
| BARCL_0632 | VirB T4SS effector protein, Bep                | 528                      | no                                      | no                      | no                        | BQ10650 <sup>c</sup> | 0.5 $\pm$ 0.12    | 6.51*                     | 11.62**   |
| BARCL_1031 | VirB T4SS effector protein, Bep                | 547                      | no                                      | no                      | no                        | BQ10650 <sup>c</sup> | 0.49 $\pm$ 0.06   | 16.29**                   | 22.75**   |
| BARCL_0245 | VirB T4SS effector protein, Bep                | 497                      | no                                      | no                      | no                        | BQ10650 <sup>c</sup> | 0.48 $\pm$ 0.11   | 10.19**                   | 18.9**    |
| BARCL_0481 | putative flagellar motor protein               | 405                      | BruAb2_1079                             | BARBAKC583_1125         | BARSC_10086               | no                   | 0.47 $\pm$ 0.08   | 0.02                      | 0.15      |
| BARCL_0075 | VirB T4SS protein, VirB7                       | 103                      | no                                      | no                      | no                        | BQ10580 <sup>c</sup> | 0.47 $\pm$ 0.09   | 0.43                      | 0.8       |
| BARCL_0645 | VirB T4SS protein, VirB7                       | 103                      | no                                      | no                      | no                        | BQ10580 <sup>c</sup> | 0.47 $\pm$ 0.09   | 0.43                      | 0.8       |
| BARCL_0690 | conserved protein of unknown function          | 77                       | BruAb1_0849                             | BARBAKC583_0864         | BARSC_40153               | BQ07510              | 0.47 $\pm$ 0.21   | 6.46*                     | 6.53*     |
| BARCL_1342 | protein of unknown function                    | 556                      | no                                      | no                      | no                        | no                   | 0.46 $\pm$ 0.08   | 35.82**                   | 55.96**   |
| BARCL_0478 | conserved protein of unknown function          | 242                      | no                                      | BARBAKC583_1128         | BARSC_10089               | no                   | 0.46 $\pm$ 0.08   | 0.00                      | 0.02      |
| BARCL_1207 | DsbB domain protein                            | 184                      | BruAb1_1630                             | BARBAKC583_0182         | BARSC_10215               | BQ11650              | 0.46 $\pm$ 0.09   | 3.33                      | 4.32      |
| BARCL_0640 | VirB T4SS effector protein, Bep                | 539                      | no                                      | no                      | no                        | BQ10650 <sup>c</sup> | 0.45 $\pm$ 0.06   | 18.16**                   | 23.35**   |
| BARCL_0669 | conserved protein of unknown function          | 77                       | no                                      | no                      | no                        | BQ07720              | 0.44 $\pm$ 0.21   | 0.00                      | 0.00      |
| BARCL_1013 | conserved protein of unknown function          | 158                      | no                                      | no                      | no                        | BQ09010              | 0.43 $\pm$ 0.07   | 2.71                      | 3.46      |
| BARCL_1355 | protein of unknown function                    | 32                       | no                                      | no                      | no                        | no                   | 0.43 $\pm$ 0.35   | 0.00                      | 0.00      |
| BARCL_0639 | VirB T4SS effector protein, Bep                | 625                      | no                                      | no                      | no                        | BQ10650 <sup>c</sup> | 0.43 $\pm$ 0.01   | 19.73**                   | 23.36**   |
| BARCL_1288 | conserved protein of unknown function          | 225                      | BruAb1_1970                             | BARBAKC583_0098         | BARSC_10295               | BQ12360              | 0.43 $\pm$ 0.11   | 0.00                      | 0.00      |
| BARCL_1327 | conserved protein of unknown function          | 387                      | BruAb1_1862                             | BARBAKC583_0063         | BARSC_10335               | BQ13000              | 0.42 $\pm$ 0.08   | 5.28                      | 5.85      |
| BARCL_1059 | conserved protein of unknown function          | 141                      | BruAb1_0406                             | BARBAKC583_0375         | BARSC_20121               | BQ03120              | 0.42 $\pm$ 0.09   | 5.04                      | 5.44      |
| BARCL_0241 | conserved protein of unknown function          | 131                      | BruAb2_0470                             | BARBAKC583_0300         | BARSC_20052               | BQ02980              | 0.42 $\pm$ 0.35   | 0.00                      | 0.00      |

| Gene       | Product                                        | Length (aa) <sup>d</sup> | Orthologs in other genomes <sup>a</sup> |                              |                           |                      | $\omega$   | PAML results <sup>b</sup> |           |
|------------|------------------------------------------------|--------------------------|-----------------------------------------|------------------------------|---------------------------|----------------------|------------|---------------------------|-----------|
|            |                                                |                          | <i>Brucella abortus</i>                 | <i>B. bacilliformis</i>      | <i>B. schoenbuchensis</i> | <i>B. quintana</i>   |            | M2a vs. M1a               | M8 vs. M7 |
| BARCL_0982 | conserved protein of unknown function          | 464                      | no                                      | no                           | no                        | no                   | 0.42 ±0.1  | 59.2**                    | 94.79**   |
| BARCL_0631 | VirB T4SS effector protein, Bep                | 538                      | no                                      | no                           | no                        | BQ10650 <sup>c</sup> | 0.42 ±0.06 | 15.09**                   | 22.57**   |
| BARCL_1351 | conserved protein of unknown function          | 221                      | BruAb1_2010                             | no                           | no                        | no                   | 0.42 ±0.13 | 0.00                      | -0.07     |
| BARCL_0069 | VirB T4SS effector protein, Bep                | 547                      | no                                      | no                           | no                        | BQ10650 <sup>c</sup> | 0.42 ±0.1  | 2.46                      | 3.4       |
| BARCL_0978 | conserved protein of unknown function          | 40                       | BruAb1_1401                             | BARBAKC583_0931              | BARSC_40323               | BQ08690              | 0.41 ±0.37 | 0.92                      | 1.20      |
| BARCL_0279 | conserved protein of unknown function          | 218                      | no                                      | BARBAKC583_1049              | BARSC_40463               | BQ09660              | 0.41 ±0.12 | 0.00                      | 0.00      |
| BARCL_1164 | conserved protein of unknown function          | 139                      | BruAb1_1640                             | BARBAKC583_0248              | BARSC_10151               | BQ11050              | 0.41 ±0.07 | 3.14                      | 3.26      |
| BARCL_1170 | conserved protein of unknown function          | 74                       | no                                      | BARBAKC583_0239              | BARSC_10161               | no                   | 0.4 ±0.25  | 0.33                      | 0.63      |
| BARCL_1173 | conserved protein of unknown function          | 152                      | no                                      | BARBAKC583_0234              | BARSC_10165               | BQ11080              | 0.4 ±0.08  | 2.39                      | 2.47      |
| BARCL_0957 | Effector protein yopJ                          | 249                      | no                                      | no                           | no                        | BQ11580 <sup>c</sup> | 0.4 ±0.07  | 5.23                      | 5.99*     |
| BARCL_0250 | Effector protein yopJ                          | 279                      | no                                      | no                           | no                        | BQ11580 <sup>c</sup> | 0.39 ±0.1  | 6.20*                     | 8.93*     |
| BARCL_0367 | conserved protein of unknown function          | 164                      | BruAb1_0516                             | BARBAKC583_0416              | BARSC_20162               | BQ03740              | 0.38 ±0.34 | 0.00                      | 0.20      |
| BARCL_1270 | ATP synthase epsilon chain                     | 138                      | BruAb1_1778                             | BARBAKC583_0115              | BARSC_10281               | BQ12220              | 0.38 ±0.08 | 1.00                      | 1.30      |
| BARCL_0473 | Inducible Bartonella autotransporter           | 673                      | no                                      | BARBAKC583_1132 <sup>c</sup> | BARSC_10091 <sup>c</sup>  | BQ10380 <sup>c</sup> | 0.38 ±0.11 | 108.28**                  | 128.21**  |
| BARCL_1329 | Antioxidant, AhpC/TSA family                   | 143                      | BruAb1_1956                             | BARBAKC583_0053              | BARSC_10347               | BQ13100              | 0.37 ±0.22 | -9.41                     | 6.16      |
| BARCL_0664 | conserved protein of unknown function          | 210                      | no                                      | BARBAKC583_0744              | BARSC_40233               | no                   | 0.37 ±0.17 | 0.78                      | 1.60      |
| BARCL_1005 | conserved protein of unknown function          | 134                      | BruAb1_1433                             | BARBAKC583_0954              | BARSC_40346               | BQ08930              | 0.37 ±0.08 | 0.83                      | 0.83      |
| BARCL_0054 | conserved protein of unknown function          | 242                      | BruAb1_2088                             | BARBAKC583_1339              | BARSC_10433               | BQ00450              | 0.36 ±0.19 | 1.53                      | 2.04      |
| BARCL_0882 | conserved protein of unknown function          | 249                      | BruAb1_1170                             | BARBAKC583_0582              | BARSC_20329               | BQ07020              | 0.36 ±0.1  | 0.00                      | 0.00      |
| BARCL_1123 | Effector protein yopJ                          | 339                      | no                                      | no                           | no                        | BQ01158 <sup>c</sup> | 0.35 ±0.13 | 6.19*                     | 8.68*     |
| BARCL_1011 | conserved protein of unknown function          | 107                      | BruAb1_1447                             | no                           | no                        | no                   | 0.35 ±0.34 | 9.59**                    | 10.29**   |
| BARCL_0115 | FxsA cytoplasmic membrane protein              | 157                      | BruAb1_2048                             | BARBAKC583_1295              | BARSC_10481               | BQ00960              | 0.35 ±0.12 | 2.27                      | 3.00      |
| BARCL_0929 | 50S ribosomal protein L29                      | 66                       | BruAb1_1230                             | BARBAKC583_0674              | BARSC_40270               | BQ08150              | 0.35 ±0.21 | 0.16                      | 0.38      |
| BARCL_0951 | conserved protein of unknown function          | 225                      | BruAb1_0953                             | BARBAKC583_0651              | BARSC_40294               | BQ08380              | 0.35 ±0.29 | 3.82                      | 3.79      |
| BARCL_0446 | conserved protein of unknown function          | 125                      | no                                      | BARBAKC583_1158              | BARSC_10119               | no                   | 0.34 ±0.15 | 0.00                      | 0.09      |
| BARCL_0480 | putative flagellar motor protein               | 426                      | BruAb2_1080                             | BARBAKC583_1126              | BARSC_10087               | no                   | 0.34 ±0.09 | 0.18                      | 0.50      |
| BARCL_1038 | conserved protein of unknown function          | 144                      | BruAb1_0895                             | no                           | no                        | BQ04750              | 0.34 ±0.1  | 2.25                      | 2.88      |
| BARCL_0699 | conserved protein of unknown function          | 85                       | BruAb1_1043                             | BARBAKC583_0854              | BARSC_40141               | BQ07410              | 0.34 ±0.07 | 0.01                      | 0.26      |
| BARCL_1165 | conserved protein of unknown function          | 228                      | BruAb1_1844                             | BARBAKC583_0247              | no                        | BQ11000              | 0.34 ±0.08 | 4.53                      | 5.07      |
| BARCL_1200 | conserved protein of unknown function          | 126                      | no                                      | BARBAKC583_0193              | BARSC_10208               | BQ11450              | 0.33 ±0.15 | 1.08                      | 1.44      |
| BARCL_1199 | conserved protein of unknown function          | 63                       | no                                      | BARBAKC583_0195              | BARSC_10207               | BQ11430              | 0.33 ±0.15 | 0.00                      | 0.00      |
| BARCL_1225 | conserved exported protein of unknown function | 352                      | BruAb1_1693                             | BARBAKC583_0156              | BARSC_10240               | BQ11930              | 0.33 ±0.11 | 0.01                      | 0.76      |
| BARCL_0670 | conserved protein of unknown function          | 813                      | no                                      | BARBAKC583_0748              | BARSC_40172               | BQ07710              | 0.32 ±0.03 | 4.85                      | 6.04*     |
| BARCL_0198 | Hemin binding protein                          | 291                      | BruAb1_0115 <sup>c</sup>                | BARBAKC583_1214 <sup>c</sup> | BARSC_40484 <sup>c</sup>  | BQ02410 <sup>c</sup> | 0.32 ±0.04 | 9.37**                    | 17.43**   |
| BARCL_0196 | Hemin binding protein                          | 277                      | BruAb1_0115 <sup>c</sup>                | BARBAKC583_1214 <sup>c</sup> | BARSC_10559 <sup>c</sup>  | BQ02410 <sup>c</sup> | 0.32 ±0.08 | 8.84*                     | 8.47*     |
| BARCL_0016 | conserved exported protein of unknown function | 199                      | BruAb1_0152                             | BARBAKC583_1369              | BARSC_10401               | BQ00150              | 0.32 ±0.21 | 1.79                      | 1.93      |
| BARCL_1166 | conserved protein of unknown function          | 297                      | no                                      | no                           | BARSC_10157               | BQ11020              | 0.32 ±0.1  | 3.22                      | 4.86      |
| BARCL_1020 | conserved protein of unknown function          | 837                      | no                                      | BARBAKC583_1109              | no                        | BQ10280              | 0.32 ±0.13 | 0.00                      | 14.52     |
| BARCL_0475 | Inducible Bartonella autotransporter           | 823                      | BruAb1_0895                             | BARBAKC583_1132 <sup>c</sup> | BARSC_10091 <sup>c</sup>  | BQ10380 <sup>c</sup> | 0.31 ±0.09 | 89.02**                   | 105.99**  |
| BARCL_0420 | conserved protein of unknown function          | 175                      | BruAb1_0433                             | BARBAKC583_0391              | BARSC_20137               | BQ03450              | 0.31 ±0.07 | 0.00                      | 0.00      |
| BARCL_0103 | 3-phosphoshikimate 1-carboxyvinyltransferase   | 442                      | BruAb1_0025                             | BARBAKC583_1303              | BARSC_10474               | BQ00880              | 0.31 ±0.06 | 7.81*                     | 9.68**    |
| BARCL_0221 | Protein slyX homolog                           | 50                       | no                                      | no                           | no                        | no                   | 0.31 ±0.12 | 0.00                      | 0.00      |
| BARCL_0867 | ABC transporter, permease protein              | 232                      | no                                      | BARBAKC583_0597              | BARSC_20344               | BQ06870              | 0.3 ±0.1   | 2.19                      | 2.56      |
| BARCL_1177 | conserved protein of unknown function          | 283                      | no                                      | BARBAKC583_0229              | BARSC_10169               | BQ11120              | 0.3 ±0.07  | 0.88                      | 2.30      |
| BARCL_0327 | conserved protein of unknown function          | 84                       | BruAb1_1516                             | BARBAKC583_0993              | BARSC_40420               | BQ03350              | 0.3 ±0.12  | 0.20                      | 0.27      |
| BARCL_0847 | Lysophospholipase I2                           | 293                      | BruAb1_0046                             | no                           | no                        | BQ05220              | 0.3 ±0.07  | 0.00                      | 0.00      |
| BARCL_1180 | conserved protein of unknown function          | 87                       | no                                      | BARBAKC583_0226              | BARSC_10177               | BQ11160              | 0.3 ±0.06  | 0.25                      | 1.15      |
| BARCL_0877 | Phosphatidate cytidyltransferase               | 269                      | BruAb1_1163                             | BARBAKC583_0587              | BARSC_20334               | BQ06970              | 0.3 ±0.09  | 0.39                      | 1.13      |
| BARCL_0781 | permease protein of ABC transporter            | 296                      | BruAb1_1771                             | no                           | BARSC_40052               | BQ06310              | 0.3 ±0.42  | 2.31                      | 3.25      |
| BARCL_1274 | ATP synthase delta subunit                     | 194                      | BruAb1_1782                             | BARBAKC583_0111              | BARSC_10285               | BQ12260              | 0.3 ±0.04  | 2.17                      | 3.83      |
| BARCL_1261 | conserved protein of unknown function          | 95                       | no                                      | no                           | BARSC_10278               | BQ12190              | 0.3 ±0.13  | 0.00                      | 0.00      |

| Gene         | Product                                        | Length (aa) <sup>d</sup> | Orthologs in other genomes <sup>a</sup> |                             |                           |                      |             | $\omega$ | PAML results <sup>b</sup> |  |  |
|--------------|------------------------------------------------|--------------------------|-----------------------------------------|-----------------------------|---------------------------|----------------------|-------------|----------|---------------------------|--|--|
|              |                                                |                          | <i>Brucella abortus</i>                 | <i>B. bacilliformis</i>     | <i>B. schoenbuchensis</i> | <i>B. quintana</i>   | M2a vs. M1a |          | M8 vs. M7                 |  |  |
| BARCL_0197   | Hemin binding protein                          | 241                      | BruAb1_0115 <sup>c</sup>                | BARBAK583_1214 <sup>c</sup> | BARSC_40297 <sup>c</sup>  | BQ02410 <sup>c</sup> | 0.29 ±0.04  | 35.92**  | 50.26**                   |  |  |
| BARCL_0381   | conserved protein of unknown function          | 172                      | BruAb1_0603                             | no                          | no                        | BQ03880              | 0.29 ±0.1   | 0.41     | 0.84                      |  |  |
| BARCL_0292   | conserved protein of unknown function          | 215                      | no                                      | no                          | no                        | BQ09490              | 0.29 ±0.1   | 2.26     | 3.5                       |  |  |
| BARCL_0559   | conserved membrane protein of unknown function | 363                      | BruAb1_0705                             | BARBAK583_0507              | BARSC_20252               | BQ04620              | 0.29 ±0.04  | 6.34*    | 7.89*                     |  |  |
| BARCL_1065   | mutator MutT protein                           | 136                      | BruAb1_1915                             | BARBAK583_0364              | BARSC_20107               | BQ01900              | 0.28 ±0.19  | 3.35     | 4.25                      |  |  |
| BARCL_0524   | pantoate-β-alanine ligase                      | 281                      | BruAb1_0355                             | BARBAK583_0476              | BARSC_20219               | BQ04310              | 0.28 ±0.09  | 0.00     | 0.00                      |  |  |
| BARCL_1125   | 50S ribosomal protein L21                      | 159                      | BruAb1_1829                             | BARBAK583_0309              | BARSC_20058               | BQ01320              | 0.28 ±0.06  | 1.80     | 3.18                      |  |  |
| BARCL_0024   | lysyl-tRNA synthetase                          | 549                      | BruAb2_0442                             | BARBAK583_1360              | BARSC_10409               | BQ00220              | 0.28 ±0.44  | 2.84     | 4.69                      |  |  |
| BARCL_1236   | TolA protein                                   | 377                      | BruAb1_1683                             | BARBAK583_0145              | BARSC_10253               | BQ11830              | 0.28 ±0.05  | 0.20     | 0.78                      |  |  |
| BARCL_1313   | SurF1 family protein                           | 255                      | BruAb1_0496                             | BARBAK583_0076              | BARSC_10321               | BQ12840              | 0.28 ±0.05  | 0.00     | 0.22                      |  |  |
| BARCL_0171   | Ribosomal-protein-alanine acetyltransferase    | 160                      | BruAb1_2125                             | BARBAK583_1242              | BARSC_10535               | BQ02150              | 0.28 ±0.13  | 2.03     | 2.25                      |  |  |
| BARCL_0518   | conserved membrane protein of unknown function | 179                      | BruAb1_0675                             | BARBAK583_0470              | BARSC_20213               | BQ04250              | 0.28 ±0.03  | 6.16*    | 9.17*                     |  |  |
| BARCL_1233   | conserved protein of unknown function          | 152                      | BruAb1_1686                             | BARBAK583_0148              | BARSC_10250               | BQ11860              | 0.28 ±0.07  | 0.08     | 0.55                      |  |  |
| BARCL_0949   | conserved protein of unknown function          | 181                      | BruAb1_0955                             | BARBAK583_0653              | BARSC_40292               | BQ08360              | 0.27 ±0.07  | 0.00     | 0.00                      |  |  |
| BARCL_0226   | conserved protein of unknown function          | 473                      | no                                      | BARBAK583_0286              | BARSC_20039               | BQ02810              | 0.27 ±0.06  | 0.00     | 0.51                      |  |  |
| BARCL_0464   | Flagellar hook-basal body complex protein flIE | 112                      | BruAb2_0149                             | BARBAK583_1142              | BARSC_10102               | no                   | 0.27 ±0.16  | 2.26     | 3.12                      |  |  |
| BARCL_1107   | Filament-A precursor                           | 391                      | BruAb1_1817                             | BARBAK583_0323              | BARSC_20069               | BQ01520              | 0.27 ±0.04  | 0.62     | 2.17                      |  |  |
| BARCL_0296   | conserved protein of unknown function          | 128                      | BruAb1_1587                             | BARBAK583_1018              | BARSC_40443               | BQ09450              | 0.27 ±0.06  | 3.57     | 4.40                      |  |  |
| BARCL_1082   | glycerol-3-phosphate ABC transporter permease  | 283                      | BruAb2_0569                             | BARBAK583_0347              | BARSC_20091               | BQ01740              | 0.27 ±0.5   | 0.00     | 0.00                      |  |  |
| BARCL_0468   | conserved protein of unknown function          | 210                      | BruAb2_0153                             | BARBAK583_1138              | BARSC_10098               | no                   | 0.27 ±0.07  | 1.35     | 2.53                      |  |  |
| BARCL_0454   | Flagellar motor switch protein flfY            | 170                      | BruAb2_1067                             | BARBAK583_1151              | BARSC_10111               | no                   | 0.27 ±0.03  | 0.44     | 1.02                      |  |  |
| BARCL_0397   | Methyltransferase                              | 162                      | no                                      | no                          | BARSC_20184               | BQ04020              | 0.26 ±0.06  | 0.00     | 0.16                      |  |  |
| BARCL_1029   | LysM/M23 peptidase domain protein              | 362                      | BruAb1_0900                             | BARBAK583_0521              | BARSC_20269               | BQ04790              | 0.26 ±0.04  | 0.28     | 1.27                      |  |  |
| BARCL_0813   | conserved protein of unknown function          | 126                      | BruAb1_1079                             | BARBAK583_0643              | BARSC_20395               | BQ05530              | 0.26 ±0.2   | 0.00     | 0.00                      |  |  |
| BARCL_0063   | conserved protein of unknown function          | 144                      | no                                      | BARBAK583_1330              | BARSC_10443               | BQ00580              | 0.26 ±0.08  | 0.00     | 0.00                      |  |  |
| BARCL_1062   | ATP synthase B chain (modular protein)         | 210                      | BruAb1_0409                             | BARBAK583_0378              | BARSC_20124               | BQ03150              | 0.26 ±0.06  | 0.36     | 1.04                      |  |  |
| BARCL_0618   | conserved protein of unknown function          | 246                      | no                                      | no                          | no                        | BQ10520 <sup>c</sup> | 0.26 ±0.04  | 0.00     | 0.97                      |  |  |
| BARCL_0651   | conserved protein of unknown function          | 246                      | no                                      | no                          | no                        | BQ10520 <sup>c</sup> | 0.26 ±0.04  | 0.00     | 0.46                      |  |  |
| BARCL_1326   | conserved protein of unknown function          | 481                      | BruAb1_1861                             | BARBAK583_0064              | BARSC_10334               | BQ12990              | 0.26 ±0.05  | 2.91     | 4.32                      |  |  |
| BARCL_1078   | ABC transporter, periplasmic binding protein   | 300                      | no                                      | BARBAK583_0350              | BARSC_20094               | BQ01770              | 0.26 ±0.08  | 3.07     | 5.27                      |  |  |
| BARCL_1246   | conserved protein of unknown function          | 121                      | BruAb1_1709                             | BARBAK583_0135              | BARSC_10260               | BQ12040              | 0.25 ±0.08  | 0.71     | 1.19                      |  |  |
| BARCL_0390   | Cytochrome c-type biogenesis protein ccmH      | 125                      | BruAb1_0629                             | BARBAK583_0433              | BARSC_20179               | BQ03960              | 0.25 ±0.04  | 0.00     | 0.00                      |  |  |
| BARCL_0325   | conserved protein of unknown function          | 350                      | BruAb1_1518                             | BARBAK583_0995              | BARSC_40422               | BQ03330              | 0.25 ±0.08  | 0.00     | 0.00                      |  |  |
| BARCL_0892   | Transcriptional regulator                      | 128                      | BruAb1_1185                             | no                          | no                        | no                   | 0.25 ±0.08  | 0.00     | 0.00                      |  |  |
| BARCL_0449   | conserved exported protein of unknown function | 147                      | BruAb2_1064                             | BARBAK583_1155              | BARSC_10115               | no                   | 0.25 ±0.07  | 3.02     | 3.88                      |  |  |
| BARCL_1254   | conserved protein of unknown function          | 506                      | BruAb1_1754                             | BARBAK583_0125              | BARSC_10271               | BQ12130              | 0.25 ±0.08  | 6.03*    | 8.46*                     |  |  |
| BARCL_1171   | putative phage protein                         | 328                      | no                                      | BARBAK583_0238              | BARSC_10163               | BQ11060              | 0.25 ±0.03  | 20.56**  | 23.36**                   |  |  |
| BARCL_0059   | heat shock protein GrpE                        | 219                      | BruAb1_0167                             | BARBAK583_1334              | BARSC_10438               | BQ00500              | 0.25 ±0.16  | 9.59**   | 12.51**                   |  |  |
| BARCL_0380   | conserved protein of unknown function          | 162                      | BruAb1_0602                             | no                          | no                        | BQ03870              | 0.25 ±0.07  | 2.26     | 2.39                      |  |  |
| BARCL_0145   | conserved exported protein of unknown function | 608                      | no                                      | no                          | no                        | no                   | 0.25 ±0.05  | 3.24     | 7.43                      |  |  |
| BARCL_0735   | conserved protein of unknown function          | 96                       | BruAb2_0644                             | BARBAK583_0797              | BARSC_40109               | BQ05830              | 0.25 ±0.16  | 5.73     | 5.83                      |  |  |
| BARCL_0191   | Formamidopyrimidine-DNA glycosylase            | 291                      | BruAb1_2156                             | BARBAK583_1221              | BARSC_10554               | BQ02370              | 0.25 ±0.17  | 1.54     | 1.94                      |  |  |
| BARCL_1278   | conserved protein of unknown function          | 190                      | BruAb1_1786                             | BARBAK583_0105              | BARSC_10290               | BQ12300              | 0.25 ±0.08  | 0.00     | 0.00                      |  |  |
| BARCL_1227   | OpgC protein                                   | 373                      | BruAb1_1691                             | BARBAK583_0154              | BARSC_10242               | BQ11910              | 0.25 ±0.06  | 3.84     | 4.08                      |  |  |
| BARCL_0565   | conserved exported protein of unknown function | 469                      | no                                      | BARBAK583_0512              | no                        | no                   | 0.25 ±0.05  | 0.00     | 2.35                      |  |  |
| BARCL_0605   | conserved protein of unknown function          | 182                      | no                                      | no                          | no                        | no                   | 0.25 ±0.24  | 0.47     | 0.09                      |  |  |
| BARCL_0566   | conserved exported protein of unknown function | 875                      | no                                      | no                          | no                        | no                   | 0.25 ±0.02  | 20.04**  | 40.96**                   |  |  |
| BARCL_1373   | Transmembrane protein                          | 150                      | BruAb2_0497                             | no                          | no                        | BQ13370              | 0.25 ±0.05  | 0.70     | 1.34                      |  |  |
| BARCLv2_0646 | VirB T4SS protein, VirB6                       | 329                      | no                                      | no                          | no                        | BQ10570              | 0.23 ± 0.06 | 10.90**  | 14.51**                   |  |  |
| BARCLv2_0076 | VirB T4SS protein, VirB6                       | 329                      | no                                      | no                          | no                        | BQ10570              | 0.23 ± 0.05 | 11.23**  | 15.01**                   |  |  |
| BARCLv2_1192 | conserved protein of unknown function          | 277                      | no                                      | BARBAK583_0204              | no                        | BQ11320              | 0.23 ± 0.04 | 11.39**  | 11.22**                   |  |  |

| Gene         | Product                                                  | Length (aa) <sup>d</sup> | Orthologs in other genomes <sup>a</sup> |                         |                           |                    | $\omega$    | PAML results <sup>b</sup> |           |
|--------------|----------------------------------------------------------|--------------------------|-----------------------------------------|-------------------------|---------------------------|--------------------|-------------|---------------------------|-----------|
|              |                                                          |                          | <i>Brucella abortus</i>                 | <i>B. bacilliformis</i> | <i>B. schoenbuchensis</i> | <i>B. quintana</i> |             | M2a vs. M1a               | M8 vs. M7 |
| BARCLv2_1175 | conserved protein of unknown function                    | 238                      | no                                      | no                      | BARSCv2_10167             | BQ11100            | 0.22 ± 0.05 | 6.66*                     | 7.86*     |
| BARCLv2_0757 | lipoprotein A                                            | 233                      | no                                      | BARBAKC583_0823         | BARSCv2_40069             | BQ06130            | 0.22 ± 0.03 | 20.99**                   | 22.80**   |
| BARCLv2_0548 | conserved membrane protein of unknown function           | 192                      | no                                      | BARBAKC583_0495         | BARSCv2_20241             | BQ04510            | 0.19 ± 0.11 | 6.76*                     | 7.72*     |
| BARCLv2_0042 | conserved membrane protein of unknown function           | 237                      | BruAb1_0163                             | BARBAKC583_1350         | BARSCv2_10420             | no                 | 0.19 ± 0.06 | 33.60**                   | 36.01**   |
| BARCLv2_0523 | DNA repair protein RecO                                  | 231                      | BruAb1_0681                             | BARBAKC583_0475         | BARSCv2_20218             | BQ04300            | 0.17 ± 0.07 | 7.28*                     | 7.52*     |
| BARCLv2_1006 | S-adenosyl-methyltransferase                             | 332                      | BruAb1_1434                             | BARBAKC583_0955         | BARSCv2_40347             | BQ08940            | 0.17 ± 0.06 | 11.69**                   | 14.05**   |
| BARCLv2_0861 | Ribose 5-phosphate isomerase                             | 226                      | BruAb1_1015                             | BARBAKC583_0602         | BARSCv2_20351             | BQ06820            | 0.17 ± 0.09 | 13.79**                   | 16.51**   |
| BARCLv2_0562 | metabolite transport protein                             | 428                      | BruAb2_0524                             | no                      | BARSCv2_20257             | BQ08640            | 0.16 ± 0.04 | 6.74*                     | 8.27*     |
| BARCLv2_0038 | S-adenosyl-L-homocysteine hydrolase                      | 459                      | BruAb1_2072                             | no                      | no                        | BQ00290            | 0.15 ± 0.09 | 6.86*                     | 8.77*     |
| BARCLv2_1344 | conserved protein of unknown function                    | 347                      | BruAb1_2032                             | BARBAKC583_0050         | BARSCv2_10349             | BQ13150            | 0.15 ± 0.03 | 9.25**                    | 13.31**   |
| BARCLv2_0176 | DNA polymerase III gamma and tau subunit                 | 604                      | BruAb1_0034                             | BARBAKC583_1238         | BARSCv2_10539             | BQ02200            | 0.14 ± 0.02 | 7.08*                     | 10.63**   |
| BARCLv2_0181 | Uncharacterized ABC transporter ATP-binding protein yefJ | 529                      | BruAb1_0006                             | no                      | BARSCv2_10544             | no                 | 0.13 ± 0.06 | 22.58**                   | 27.27**   |
| BARCLv2_1272 | ATP synthase gamma chain                                 | 303                      | BruAb1_1780                             | BARBAKC583_0113         | BARSCv2_10283             | BQ12240            | 0.11 ± 0.03 | 7.21*                     | 9.98**    |
| BARCLv2_0732 | Prolyl-tRNA synthetase                                   | 441                      | BruAb1_0836                             | BARBAKC583_0794         | BARSCv2_40106             | BQ05800            | 0.11 ± 0.03 | 6.24*                     | 8.39*     |
| BARCLv2_0692 | phosphoribosylformylglycinamide synthase I               | 222                      | BruAb1_0853                             | BARBAKC583_0861         | BARSCv2_40150             | BQ07490            | 0.10 ± 0.02 | 9.52**                    | 11.51**   |
| BARCLv2_0542 | DNA repair protein                                       | 461                      | BruAb1_0471                             | BARBAKC583_0489         | BARSCv2_20235             | BQ04450            | 0.10 ± 0.03 | 12.67**                   | 18.86**   |
| BARCLv2_0923 | 30S ribosomal protein S8                                 | 132                      | BruAb1_1224                             | BARBAKC583_0712         | BARSCv2_40264             | BQ08090            | 0.10 ± 0.09 | 6.23*                     | 8.56*     |
| BARCLv2_0242 | glutamate-cysteine ligase                                | 457                      | BruAb2_0469                             | BARBAKC583_0301         | BARSCv2_20053             | BQ02990            | 0.10 ± 0.03 | 9.01*                     | 13.83**   |
| BARCLv2_0743 | peptide chain release factor RF-2                        | 317                      | BruAb1_0927                             | BARBAKC583_0804         | BARSCv2_40117             | BQ05900            | 0.10 ± 0.03 | 8.38*                     | 10.04**   |
| BARCLv2_1271 | ATP synthase beta chain                                  | 530                      | BruAb1_1779                             | BARBAKC583_0114         | BARSCv2_10282             | BQ12230            | 0.09 ± 0.02 | 8.47*                     | 8.92*     |
| BARCLv2_0362 | conserved membrane protein of unknown function           | 957                      | BruAb1_0503                             | BARBAKC583_0410         | BARSCv2_20156             | BQ03650            | 0.09 ± 0.01 | 6.35*                     | 8.42*     |
| BARCLv2_0924 | 30S ribosomal protein S14                                | 100                      | BruAb1_1225                             | BARBAKC583_0711         | BARSCv2_40265             | BQ08100            | 0.09 ± 0.07 | 11.89**                   | 12.52*    |
| BARCLv2_0329 | sensor histidine kinase                                  | 445                      | BruAb1_1513                             | BARBAKC583_0990         | BARSCv2_40418             | BQ03380            | 0.08 ± 0.05 | 8.09*                     | 9.76**    |
| BARCLv2_0136 | cytochrome o ubiquinol oxidase subunit I                 | 672                      | BruAb1_0490                             | BARBAKC583_1274         | BARSCv2_10503             | BQ01160            | 0.08 ± 0.01 | 7.58*                     | 10.68**   |
| BARCLv2_0477 | flagellar M-ring protein                                 | 554                      | BruAb2_1083                             | BARBAKC583_1129         | BARSCv2_10090             | no                 | 0.08 ± 0.01 | 6.03*                     | 11.35**   |
| BARCLv2_0096 | Iron transport protein, inner membrane component         | 287                      | no                                      | BARBAKC583_1309         | BARSCv2_10466             | BQ00810            | 0.08 ± 0.01 | 22.06**                   | 26.61**   |
| BARCLv2_0165 | transcriptional regulator                                | 137                      | BruAb1_2132                             | BARBAKC583_1248         | BARSCv2_10529             | BQ02090            | 0.08 ± 0.04 | 6.79*                     | 7.01*     |
| BARCLv2_0611 | gid-family protein                                       | 455                      | BruAb1_0906                             | BARBAKC583_0551         | BARSCv2_20300             | no                 | 0.07 ± 0.01 | 6.35*                     | 7.95*     |
| BARCLv2_0747 | DNA repair protein RadC                                  | 261                      | BruAb1_1284                             | BARBAKC583_0830         | BARSCv2_40060             | BQ06240            | 0.07 ± 0.01 | 14.09**                   | 16.76**   |
| BARCLv2_1073 | ribonucleoside-diphosphate reductase 2 alpha chain       | 708                      | BruAb2_0865                             | BARBAKC583_0356         | BARSCv2_20099             | BQ01820            | 0.04 ± 0.01 | 6.44*                     | 8.71*     |

<sup>a</sup>for ortholog assignment the “Phylo Profile Synteny” tool of MaGe [58] was used (parameters: Bidirectional Blast Hit, 30 % identities, 0.6 for minLrap and maxLrap), automated ortholog assignments were manually curated.

<sup>b</sup>LRT statistics for model M2a vs. model M1a and model M8 vs. model M7, values indicating significant positive selection are depicted by asterisks (\*: p <0.05, \*\*: p <0.01).

<sup>c</sup>more than one orthologous gene is present in the corresponding genome, no clear ortholog assignment possible.

<sup>d</sup>aa means analyzed gene length in amino acids.
