# Supplementary material
Source: PubMed Central journal article supplement (PMC3037411)
Supplement: pgen.1001296.s009.pdf [file pgen.1001296.s009.pdf]

**Table S3.** Genes of lineage 4 with average  $dn/ds$  values ( $\omega$ )  $\geq 0.25$  and/or site-specific positive selection detected by CodeML (model M2a vs. model M1a). Genes are ordered according to  $\omega$ . Genes with  $\omega < 0.25$ , but with sites under positive selection are indicated by gray color. *virB* T4SS, *bep*, and *trw* T4SS genes are indicated by orange color. Orthologous genes present in genomes of other lineages are shown. Likelihood-ratio-test (LRT) results of the CodeML selection analysis are given for comparison of model M2a vs. M1a and model M8 vs. M7.

| Gene    | Product                                        | Length (aa) <sup>d</sup> | Orthologs in other genomes <sup>a</sup> |                              |                           |                         | $\omega$   | CodeML results <sup>b</sup> |          |
|---------|------------------------------------------------|--------------------------|-----------------------------------------|------------------------------|---------------------------|-------------------------|------------|-----------------------------|----------|
|         |                                                |                          | <i>Brucella abortus</i>                 | <i>B. bacilliformis</i>      | <i>B. schoenbuchensis</i> | <i>B. clarridgeiae</i>  |            | M1a vs M2a                  | M7 vs M8 |
| BQ12460 | conserved protein of unknown function          | 203                      | no                                      | no                           | no                        | no                      | 0.9 ±0.08  | 6.18*                       | 7.35*    |
| BQ04750 | conserved protein of unknown function          | 134                      | no                                      | no                           | no                        | BARCL_1038              | 0.84 ±0.09 | 4.26                        | 5.16     |
| BQ03120 | conserved protein of unknown function          | 135                      | BruAb1_0406                             | BARBAKC583_0375              | BARSC_20121               | BARCL_1059              | 0.57 ±0.08 | 2.13                        | 3.60     |
| BQ10680 | VirB T4SS effector protein, BepF               | 555                      | no                                      | no                           | no                        | BARCL_0069 <sup>c</sup> | 0.51 ±0.02 | 7.26*                       | 18.84**  |
| BQ01050 | conserved protein of unknown function          | 83                       | no                                      | BARBAKC583_1287              | BARSC_10492               | BARCL_0125              | 0.5 ±0.24  | 0.00                        | 0.00     |
| BQ09660 | conserved protein of unknown function          | 228                      | no                                      | no                           | no                        | BARCL_0279              | 0.49 ±0.11 | 1.72                        | 3.54     |
| BQ12470 | Trw T4SS protein, TrwN                         | 189                      | no                                      | no                           | no                        | no                      | 0.48 ±0.1  | 13.35**                     | 16.79**  |
| BQ11430 | conserved protein of unknown function          | 62                       | no                                      | BARBAKC583_0195              | BARSC_10207               | BARCL_1199              | 0.46 ±0.18 | 2.47                        | 3.88     |
| BQ03700 | conserved exported protein of unknown function | 111                      | no                                      | no                           | no                        | no                      | 0.45 ±0.1  | 0.00                        | 0.07     |
| BQ12560 | Trw T4SS protein, TrwL5                        | 102                      | no                                      | no                           | no                        | no                      | 0.43 ±0.18 | 7.42*                       | 8.76*    |
| BQ13300 | conserved exported protein of unknown function | 129                      | no                                      | no                           | no                        | no                      | 0.41 ±0.13 | 1.20                        | 2.10     |
| BQ04170 | TonB protein                                   | 248                      | BruAb1_0622                             | BARBAKC583_0461              | BARSC_20204               | BARCL_0416              | 0.41 ±0.1  | 10.25**                     | 15.14**  |
| BQ12930 | Chorismate mutase                              | 110                      | BruAb1_1804                             | no                           | BARSC_10329               | BARCL_1321              | 0.4 ±0.09  | 2.55                        | 3.34     |
| BQ11180 | conserved protein of unknown function          | 83                       | BruAb1_0275                             | BARBAKC583_0213              | no                        | BARCL_1184              | 0.4 ±0.18  | 2.45                        | 4.83     |
| BQ10970 | conserved protein of unknown function          | 67                       | no                                      | BARBAKC583_0251              | BARSC_10148               | BARCL_1160              | 0.4 ±0.16  | 0.00                        | 0.00     |
| BQ09320 | conserved exported protein of unknown function | 99                       | BruAb1_1503                             | BARBAKC583_0985              | no                        | BARCL_0336              | 0.39 ±0.37 | 0.00                        | 0.00     |
| BQ12610 | Trw T4SS protein, TrwH1                        | 47                       | no                                      | no                           | no                        | no                      | 0.37 ±0.09 | 5.66                        | 6.75*    |
| BQ04650 | conserved exported protein of unknown function | 87                       | no                                      | BARBAKC583_0511              | BARSC_20256               | no                      | 0.37 ±0.14 | 0.00                        | 0.12     |
| BQ12600 | Trw T4SS protein, TrwL1                        | 281                      | no                                      | no                           | no                        | no                      | 0.36 ±0.05 | 0.00                        | 0.00     |
| BQ11050 | conserved protein of unknown function          | 148                      | BruAb1_1640                             | BARBAKC583_0248              | BARSC_10151               | BARCL_1164              | 0.35 ±0.13 | 0.17                        | 0.63     |
| BQ06010 | conserved protein of unknown function          | 103                      | no                                      | no                           | BARSC_40129               | BARCL_0768              | 0.35 ±0.14 | 1.27                        | 0.00     |
| BQ11480 | conserved protein of unknown function          | 290                      | no                                      | BARBAKC583_0188              | BARSC_10210               | BARCL_1202              | 0.35 ±0.08 | 6.81*                       | 12.38**  |
| BQ00140 | conserved exported protein of unknown function | 213                      | BruAb1_0151                             | BARBAKC583_1370              | BARSC_10400               | BARCL_0015              | 0.35 ±0.05 | 0.15                        | 1.95     |
| BQ03410 | conserved exported protein of unknown function | 205                      | BruAb1_1507                             | BARBAKC583_0987              | BARSC_40414               | no                      | 0.35 ±0.16 | 0.00                        | 3.56     |
| BQ09010 | conserved protein of unknown function          | 176                      | no                                      | no                           | no                        | BARCL_1013              | 0.35 ±0.09 | 2.67                        | 3.54     |
| BQ07710 | conserved protein of unknown function          | 819                      | no                                      | BARBAKC583_0748              | BARSC_40172               | BARCL_0670              | 0.35 ±0.05 | 11.50**                     | 16.37**  |
| BQ01360 | conserved protein of unknown function          | 73                       | no                                      | no                           | no                        | no                      | 0.34 ±0.13 | 0.00                        | 0.29     |
| BQ10580 | VirB T4SS protein, VirB7                       | 100                      | no                                      | no                           | no                        | BARCL_0075 <sup>c</sup> | 0.34 ±0.08 | 1.13                        | 2.54     |
| BQ10660 | VirB T4SS effector protein, BepE               | 414                      | no                                      | no                           | no                        | BARCL_0069 <sup>c</sup> | 0.33 ±0.07 | 0.00                        | 0.87     |
| BQ06720 | conserved exported protein of unknown function | 109                      | no                                      | no                           | no                        | no                      | 0.33 ±0.08 | 0.00                        | 1.27     |
| BQ11620 | conserved protein of unknown function          | 70                       | no                                      | BARCK0786                    | no                        | no                      | 0.32 ±0.06 | 0.00                        | 0.00     |
| BQ11600 | conserved exported protein of unknown function | 74                       | no                                      | BARBAKC583_1056 <sup>c</sup> | BARSC_20032 <sup>c</sup>  | no                      | 0.32 ±0.19 | 0.89                        | 2.96     |
| BQ08690 | conserved protein of unknown function          | 60                       | BruAb1_1401                             | BARBAKC583_0931              | BARSC_40323               | BARCL_0978              | 0.32 ±0.27 | 5.19                        | 5.20     |
| BQ01620 | conserved exported protein of unknown function | 353                      | BruAb2_0057                             | no                           | no                        | no                      | 0.32 ±0.05 | 0.00                        | 0.00     |
| BQ10630 | VirB T4SS effector protein, BepA               | 272                      | no                                      | no                           | no                        | BARCL_0069 <sup>c</sup> | 0.32 ±0.09 | 0.00                        | 2.47     |

| Gene    | Product                                                | Length (aa) <sup>d</sup> | Orthologs in other genomes <sup>a</sup> |                              |                           |                         | $\omega$    | CodeML results <sup>b</sup> |          |
|---------|--------------------------------------------------------|--------------------------|-----------------------------------------|------------------------------|---------------------------|-------------------------|-------------|-----------------------------|----------|
|         |                                                        |                          | <i>Brucella abortus</i>                 | <i>B. bacilliformis</i>      | <i>B. schoenbuchensis</i> | <i>B. clarridgeiae</i>  |             | M1a vs M2a                  | M7 vs M8 |
| BQ02210 | conserved exported protein of unknown function         | 134                      | no                                      | no                           | no                        | no                      | 0.31 ±0.08  | 4.14                        | 7.18*    |
| BQ12190 | conserved protein of unknown function                  | 93                       | no                                      | no                           | BARSC_10278               | BARCL_1261              | 0.31 ±0.14  | 0.00                        | 0.56     |
| BQ11040 | conserved protein of unknown function                  | 114                      | no                                      | no                           | no                        | BARCL_1163              | 0.31 ±0.08  | 0.00                        | 0.00     |
| BQ11100 | conserved protein of unknown function                  | 231                      | no                                      | no                           | BARSC_10167               | BARCL_1175              | 0.31 ±0.07  | 4.52                        | 9.25**   |
| BQ13000 | conserved protein of unknown function                  | 389                      | BruAb1_1862                             | BARBAKC583_0063              | BARSC_10335               | BARCL_1327              | 0.31 ±0.06  | 1.57                        | 4.80     |
| BQ13100 | Thiol 3-disulfide interchange protein                  | 226                      | BruAb1_1956                             | BARBAKC583_0053              | BARSC_10347               | BARCL_1329              | 0.3 ±0.06   | 0.13                        | 0.70     |
| BQ10410 | conserved exported protein of unknown function         | 792                      | no                                      | BARBAKC583_1132 <sup>c</sup> | BARSC_10091               | BARCL_0476 <sup>c</sup> | 0.3 ±0.07   | 0.00                        | 14.87**  |
| BQ05360 | conserved protein of unknown function                  | 584                      | no                                      | no                           | BARSC_20378               | BARCL_0831              | 0.3 ±0.06   | 0.00                        | 0.95     |
| BQ12260 | ATP synthase delta chain                               | 194                      | BruAb1_1782                             | BARBAKC583_0111              | BARSC_10285               | BARCL_1274              | 0.3 ±0.07   | 0.13                        | 1.18     |
| BQ05570 | conserved protein of unknown function                  | 164                      | no                                      | BARBAKC583_0647              | BARSC_20400               | BARCL_0810              | 0.3 ±0.13   | 22.22**                     | 25.47**  |
| BQ07410 | conserved protein of unknown function                  | 157                      | no                                      | BARBAKC583_0854              | BARSC_40141               | BARCL_0699              | 0.29 ±0.05  | 5.81                        | 13.24**  |
| BQ03690 | conserved exported protein of unknown function         | 118                      | no                                      | no                           | no                        | no                      | 0.29 ±0.08  | 1.17                        | 1.65     |
| BQ04440 | colicin V production protein                           | 189                      | BruAb1_0470                             | BARBAKC583_0487              | BARSC_20233               | BARCL_0541              | 0.29 ±0.04  | 0.22                        | 2.08     |
| BQ10530 | VirB T4SS protein, VirB2                               | 104                      | no                                      | no                           | no                        | BARCL_0080 <sup>c</sup> | 0.29 ±0.09  | 0.00                        | 0.00     |
| BQ02150 | ribosomal-protein-alanine acetyltransferase            | 160                      | BruAb1_2125                             | BARBAKC583_1242              | BARSC_10535               | BARCL_0171              | 0.29 ±0.07  | 0.00                        | 0.00     |
| BQ13290 | conserved exported protein of unknown function         | 127                      | BruAb1_0462                             | BARBAKC583_0036              | BARSC_10358               | BARCL_1361              | 0.28 ±0.06  | 1.23                        | 3.51     |
| BQ10840 | orotidine 5'-phosphate decarboxylase                   | 280                      | no                                      | no                           | no                        | no                      | 0.28 ±0.27  | 0.00                        | 2.83     |
| BQ01520 | filament-A precursor                                   | 424                      | BruAb1_1817                             | BARBAKC583_0323              | BARSC_20069               | BARCL_1107              | 0.28 ±0.04  | 0.00                        | 0.65     |
| BQ08360 | conserved protein of unknown function                  | 184                      | BruAb1_0955                             | BARBAKC583_0653              | BARSC_40292               | BARCL_0949              | 0.28 ±0.03  | 5.59                        | 7.19*    |
| BQ10650 | VirB T4SS effector protein, BepC                       | 532                      | no                                      | no                           | no                        | BARCL_0069 <sup>c</sup> | 0.28 ±0.02  | 0.00                        | 5.30     |
| BQ03680 | conserved exported protein of unknown function         | 117                      | no                                      | no                           | no                        | no                      | 0.28 ±0.05  | 0.00                        | 2.18     |
| BQ00120 | conserved exported protein of unknown function         | 89                       | BruAb1_0148                             | BARBAKC583_1372              | BARSC_10398               | BARCL_0013              | 0.28 ±0.11  | 2.10                        | 4.03     |
| BQ05220 | lysophospholipase L2                                   | 300                      | BruAb2_0046                             | no                           | no                        | BARCL_0847              | 0.28 ±0.08  | 0.00                        | 1.49     |
| BQ13310 | Na <sup>+</sup> /H <sup>+</sup> antiporter             | 133                      | BruAb2_0717                             | BARBAKC583_0035              | BARSC_10359               | no                      | 0.27 ±0.05  | 0.85                        | 2.19     |
| BQ12110 | conserved exported protein of unknown function         | 480                      | BruAb1_1746                             | BARBAKC583_0127              | BARSC_10269               | BARCL_1252              | 0.27 ±0.05  | 0.09                        | 2.72     |
| BQ03350 | conserved protein of unknown function                  | 85                       | BruAb1_1516                             | BARBAKC583_0993              | BARSC_40420               | BARCL_0327              | 0.27 ±0.13  | 3.11                        | 4.24     |
| BQ03940 | Cytochrome c maturation protein E, Heme chaperone ccmE | 159                      | BruAb1_0627                             | BARBAKC583_0431              | BARSC_20177               | BARCL_0388              | 0.27 ±0.06  | 0.00                        | 0.00     |
| BQ07900 | conserved exported protein of unknown function         | 181                      | no                                      | BARBAKC583_0732              | BARSC_40244               | no                      | 0.27 ±0.06  | 0.00                        | 0.28     |
| BQ02450 | conserved exported protein of unknown function         | 160                      | BruAb2_0198                             | no                           | BARSC_10563               | BARCL_0200              | 0.27 ±0.05  | 1.81                        | 3.65     |
| BQ02710 | predicted membrane protein                             | 212                      | BruAb1_1363                             | BARBAKC583_1194              | BARSC_10008               | BARCL_0216              | 0.27 ±0.06  | 1.08                        | 2.68     |
| BQ05460 | conserved protein of unknown function                  | 183                      | BruAb1_0790                             | BARBAKC583_0636              | BARSC_20388               | BARCL_0821              | 0.27 ±0.08  | 0.00                        | 0.02     |
| BQ04740 | sec-independent protein translocase                    | 103                      | BruAb1_0894                             | no                           | no                        | BARCL_1039              | 0.27 ±0.07  | 0.54                        | 1.59     |
| BQ03900 | conserved protein of unknown function                  | 77                       | BruAb1_0622                             | BARBAKC583_0427              | BARSC_20172               | BARCL_0383              | 0.26 ±0.12  | 0.00                        | 0.00     |
| BQ11060 | Phage tail protein                                     | 260                      | no                                      | BARBAKC583_0238              | BARSC_10163               | BARCL_1171              | 0.26 ±0.04  | 0.00                        | 0.00     |
| BQ10290 | autotransporter                                        | 1753                     | no                                      | no                           | no                        | no                      | 0.26 ±0.08  | 202.48**                    | 254.68** |
| BQ12220 | ATP synthase epsilon chain                             | 138                      | BruAb1_1778                             | BARBAKC583_0115              | BARSC_10281               | BARCL_1270              | 0.26 ±0.07  | 0.00                        | 0.70     |
| BQ12590 | Trw T4SS protein, TrwJ1                                | 240                      | no                                      | no                           | no                        | no                      | 0.26 ±0.05  | 13.80**                     | 20.03**  |
| BQ10850 | conserved membrane protein of unknown function         | 357                      | no                                      | no                           | no                        | no                      | 0.26 ±0.06  | 0.00                        | 1.24     |
| BQ00960 | conserved membrane protein of unknown function         | 163                      | BruAb1_2048                             | BARBAKC583_1295              | BARSC_10481               | BARCL_0115              | 0.26 ±0.05  | 1.63                        | 4.89     |
| BQ11450 | conserved protein of unknown function                  | 129                      | no                                      | BARBAKC583_0193              | BARSC_10208               | BARCL_1200              | 0.26 ±0.1   | 0.00                        | 2.28     |
| BQ02420 | Hemin binding protein, HbpA                            | 267                      | BruAb1_0115 <sup>c</sup>                | BARBAKC583_1214 <sup>c</sup> | BARSC_10560 <sup>c</sup>  | BARCL_0196 <sup>c</sup> | 0.25 ±0.03  | 19.27**                     | 24.17**  |
| BQ12970 | conserved protein of unknown function                  | 327                      | no                                      | no                           | no                        | no                      | 0.25 ±0.05  | 0.00                        | 0.00     |
| BQ10280 | autotransporter                                        | 799                      | no                                      | BARBAKC583_1109              | BARSC_10011               | BARCL_1020              | 0.25 ±0.06  | 0.00                        | 14.65**  |
| BQ10380 | Inducible Bartonella autotransporter                   | 759                      | no                                      | BARBAKC583_1132 <sup>c</sup> | BARSC_10092               | BARCL_0475 <sup>c</sup> | 0.25 ±0.04  | 0.00                        | 0.00     |
| BQ02810 | conserved protein of unknown function                  | 447                      | no                                      | BARBAKC583_0286              | BARSC_20039               | BARCL_0226              | 0.25 ±0.03  | 0.16                        | 2.96     |
| BQ11830 | TolA protein                                           | 381                      | BruAb1_1683                             | BARBAKC583_0145              | BARSC_10253               | BARCL_1236              | 0.25 ±0.03  | 0.00                        | 5.10     |
| BQ04010 | Hemin binding protein, HbpD                            | 270                      | BruAb1_0115 <sup>c</sup>                | BARBAKC583_1214 <sup>c</sup> | BARSC_40297 <sup>c</sup>  | BARCL_0196 <sup>c</sup> | 0.25 ±0.05  | 17.49**                     | 26.87**  |
| BQ09930 | conserved membrane protein of unknown function         | 361                      | no                                      | no                           | BARSC_40486               | BARCL_1127              | 0.25 ±0.06  | 0.00                        | 0.00     |
| BQ10560 | VirB T4SS protein, VirB5                               | 146                      | no                                      | no                           | no                        | BARCL_0077 <sup>c</sup> | 0.25 ±0.07  | 1.08                        | 2.57     |
| BQ02680 | conserved exported protein of unknown function         | 106                      | no                                      | no                           | no                        | BARCL_0220              | 0.25 ±      | 1.52                        | 3.58     |
| BQ08430 | Hemin-binding protein E                                | 204                      | no                                      | no                           | BARSCv2_40484             | BARCLv2_0197            | 0.23 ± 0.12 | 46.4**                      | 53.52**  |
| BQ01540 | RNA pyrophosphohydrolase                               | 173                      | BruAb1_1815                             | BARBAKC583_0325              | BARSCv2_20071             | BARCLv2_1105            | 0.2 ± 0.02  | 14.5**                      | 16.8**   |

| Gene    | Product                                                            | Length (aa) <sup>d</sup> | Orthologs in other genomes <sup>a</sup> |                         |                           |                        | $\omega$    | CodeML results <sup>b</sup> |          |
|---------|--------------------------------------------------------------------|--------------------------|-----------------------------------------|-------------------------|---------------------------|------------------------|-------------|-----------------------------|----------|
|         |                                                                    |                          | <i>Brucella abortus</i>                 | <i>B. bacilliformis</i> | <i>B. schoenbuchensis</i> | <i>B. clarridgeiae</i> |             | M1a vs M2a                  | M7 vs M8 |
| BQ12670 | TrwE protein                                                       | 370                      | BruAb2_0060                             | no                      | no                        | no                     | 0.19 ± 0.01 | 11.7**                      | 16.6**   |
| BQ03870 | conserved protein of unknown function                              | 179                      | BruAb1_0602                             | no                      | no                        | no                     | 0.16 ± 0.05 | 6.8*                        | 11.52**  |
| BQ03470 | 4-hydroxybenzoate octaprenyltransferase                            | 334                      | BruAb1_0438                             | BARBAKC583_0393         | BARSCv2_20139             | BARCLv2_0423           | 0.13 ± 0.02 | 6.97*                       | 9.53**   |
| BQ02550 | Tetraacyldisaccharide 4'-kinase (Lipid A 4'-kinase)                | 339                      | BruAb2_0212                             | BARBAKC583_1203         | BARSCv2_10573             | BARCLv2_0210           | 0.11 ± 0.02 | 8.65*                       | 22.41**  |
| BQ11750 | cell division protein FtsH                                         | 709                      | BruAb1_1676                             | BARBAKC583_0168         | BARSCv2_10228             | BARCLv2_1216           | 0.11 ± 0.01 | 8.45*                       | 10.66**  |
| BQ13340 | multicomponent K <sup>+</sup> :H <sup>+</sup> antiporter subunit D | 540                      | BruAb2_0720                             | BARBAKC583_0032         | BARSCv2_10362             | no                     | 0.1 ± 0.01  | 7.37*                       | 16.28**  |
| BQ11850 | tolQ protein                                                       | 237                      | BruAb1_1685                             | BARBAKC583_0147         | BARSCv2_10251             | BARCLv2_1234           | 0.1 ± 0.03  | 9.38**                      | 13.72**  |
| BQ09260 | aspartate aminotransferase A                                       | 400                      | BruAb1_1488                             | BARBAKC583_0979         | BARSCv2_40405             | BARCLv2_0344           | 0.09 ± 0.01 | 6.7*                        | 9.56**   |
| BQ13010 | Probable O-sialoglycoprotein endopeptidase                         | 364                      | BruAb1_1865                             | BARBAKC583_0062         | BARSCv2_10336             | BARCLv2_1338           | 0.08 ± 0.01 | 6.57*                       | 13.09**  |
| BQ10230 | homoserine dehydrogenase                                           | 442                      | BruAb2_0263                             | BARBAKC583_1106         | BARSCv2_40508             | BARCLv2_0496           | 0.08 ± 0.02 | 6.67*                       | 14.13**  |
| BQ05680 | NADH dehydrogenase I, E subunit                                    | 216                      | BruAb1_0820                             | BARBAKC583_0782         | BARSCv2_40094             | BARCLv2_0720           | 0.06 ± 0.03 | 30.19**                     | 45.73**  |
| BQ10090 | Ferredoxin--NADP reductase (FNR) (Protein X)                       | 252                      | BruAb1_0357                             | BARBAKC583_1092         | BARSCv2_40496             | BARCLv2_1141           | 0.03 ± 0.01 | 9.41**                      | 16.38**  |

<sup>a</sup>for ortholog assignment the “Phylo Profile Synteny” tool of MaGe [58] was used (parameters: Bidirectional Blast Hit, 30 % identities, 0.6 for minLrap and maxLrap), automated ortholog assignments were manually curated.

<sup>b</sup>LRT statistics for model M2a vs. model M1a and model M8 vs. model M7, values indicating significant positive selection are depicted by asterisks (\*: p <0.05, \*\*: p <0.01).

<sup>c</sup>more than one orthologous gene is present in the corresponding genome, no clear ortholog assignment possible.

<sup>d</sup>aa means analyzed gene length in amino acids.
