# Supplementary material
Source: PubMed Central journal article supplement (PMC3037411)
Supplement: pgen.1001296.s010.pdf [file pgen.1001296.s010.pdf]

**Table S4.** Prediction of tyrosine-phosphorylation sites for Beps of Bep clade 9 using NetPhos2.0 [52], ScanSite [53], and KinasePhos [54]. Except for BARCL\_1035, tandem-repeated motifs were detected in all genes of Bep clade 9.

| Locus_tag   | Species              | Pos. | NetPhos2.0 prediction <sup>a</sup> |       | ScanSite prediction <sup>b</sup> |        |                                                                                  | KinasePhos prediction <sup>c</sup> |                              |
|-------------|----------------------|------|------------------------------------|-------|----------------------------------|--------|----------------------------------------------------------------------------------|------------------------------------|------------------------------|
|             |                      |      | Motif                              | Score | High                             | Medium | predicted kinase                                                                 | 100% specificity                   | predicted kinase             |
| B11C_150019 | <i>B. sp.</i> 1-1C   | 255  | SSGIYTNYN                          | 0.966 | no                               | yes    | Grb2 SH2, Lck kinase                                                             | yes                                | INSR kinase                  |
| B11C_150019 | <i>B. sp.</i> 1-1C   | 278  | SSGIYTNYN                          | 0.966 | no                               | yes    | Grb2 SH2, Lck kinase                                                             | yes                                | INSR kinase                  |
| B11C_150019 | <i>B. sp.</i> 1-1C   | 297  | SEEEYSAIY                          | 0.989 | yes                              | yes    | Shc SH2, <b>INSR kinase</b>                                                      | yes                                | Src kinase                   |
| B11C_150019 | <i>B. sp.</i> 1-1C   | 317  | NEEEYSGIY                          | 0.979 | yes                              | yes    | <b>Fgr</b> , Lck, INSR kinases, <b>Shc SH2</b>                                   | yes                                | Src, INSR kinases            |
| B11C_150019 | <i>B. sp.</i> 1-1C   | 321  | YSGIYESYD                          | 0.899 | yes                              | yes    | <b>Src</b> , Lck kinases, Lck SH2                                                | yes                                | Syk, INSR kinases            |
| B11C_150019 | <i>B. sp.</i> 1-1C   | 340  | NEEEYSGIY                          | 0.979 | yes                              | yes    | <b>Fgr</b> , Lck, INSR kinases, <b>Shc SH2</b>                                   | yes                                | Syk, INSR kinases            |
| B11C_150019 | <i>B. sp.</i> 1-1C   | 344  | YSGIYANYD                          | 0.923 | yes                              | yes    | Fgr, Lck, Src, <b>Grb2 SH</b>                                                    | yes                                | INSR kinase                  |
| B11C_150019 | <i>B. sp.</i> 1-1C   | 363  | NEEEYSGIY                          | 0.979 | yes                              | yes    | <b>Fgr</b> , Lck, INSR kinases, <b>Shc SH2</b>                                   | yes                                | Src, INSR kinases            |
| B11C_150019 | <i>B. sp.</i> 1-1C   | 367  | YSGIYANCD                          | 0.898 | no                               | yes    | Itk SH2                                                                          | yes                                | INSR kinase                  |
| B11C_150019 | <i>B. sp.</i> 1-1C   | 396  | NDDIYDNKD                          | 0.987 | no                               | yes    | Src kinase                                                                       | yes                                | Syk, INSR kinases            |
| B11C_150019 | <i>B. sp.</i> 1-1C   | 402  | NKDIYDSAN                          | 0.983 | no                               | no     | -                                                                                | yes                                | EGFR, INSR kinases           |
| B11C_150019 | <i>B. sp.</i> 1-1C   | 414  | NDDIYDNKD                          | 0.987 | no                               | yes    | Src kinase                                                                       | yes                                | Syk, INSR kinases            |
| B11C_150019 | <i>B. sp.</i> 1-1C   | 420  | NKDIYDSAN                          | 0.983 | no                               | no     | -                                                                                | yes                                | EGFR, INSR kinases           |
| B11C_150019 | <i>B. sp.</i> 1-1C   | 432  | NDDIYDNKD                          | 0.987 | no                               | yes    | Src kinase                                                                       | yes                                | Syk, INSR kinases            |
| B11C_150019 | <i>B. sp.</i> 1-1C   | 438  | NKDIYDNPN                          | 0.99  | yes                              | yes    | <b>Abl</b> , <b>Nck</b> , Crk, Itk SH2                                           | yes                                | Syk, EGFR, INSR kinases      |
| B11C_150019 | <i>B. sp.</i> 1-1C   | 660  | KEDDYQTLA                          | 0.991 | no                               | no     | -                                                                                | yes                                | Syk, EGFR, INSR kinases      |
| BARRO_80017 | <i>B. rochalimae</i> | 4    | -MPNYLVLP                          | 0.969 | no                               | yes    | PDFGR kinase, PLCg SH2                                                           | no                                 | -                            |
| BARRO_80017 | <i>B. rochalimae</i> | 253  | QEGIYANYN                          | 0.979 | yes                              | yes    | Fgr, <b>Lck</b> , Abl, Src kinases                                               | yes                                | INSR kinase                  |
| BARRO_80017 | <i>B. rochalimae</i> | 277  | NEDIYDTTD                          | 0.986 | yes                              | yes    | Lck, <b>Src</b> , Abl kinases                                                    | yes                                | Syk, Jak, EGFR, INSR kinases |
| BARRO_80017 | <i>B. rochalimae</i> | 283  | TTDIYDNPD                          | 0.964 | yes                              | yes    | <b>Abl</b> , Crk, <b>Nck</b> , Itk SH2                                           | yes                                | Syk, INSR kinases            |
| BARRO_80017 | <i>B. rochalimae</i> | 301  | EEDIYANYN                          | 0.993 | yes                              | yes    | <b>Fgr</b> , <b>Lck</b> , <b>Src</b> , Abl kinases, <b>Grb2</b> , <b>Itk SH2</b> | yes                                | Src, Syk, INSR kinases       |
| BARRO_80017 | <i>B. rochalimae</i> | 320  | NEGEYSPTY                          | 0.986 | no                               | no     | -                                                                                | yes                                | Srk, EGFR, INSR kinases      |
| BARRO_80017 | <i>B. rochalimae</i> | 324  | YSPTYNTTG                          | 0.938 | no                               | no     | -                                                                                | yes                                | Syk kinases                  |
| BARRO_80017 | <i>B. rochalimae</i> | 330  | TTGIYENPD                          | 0.927 | yes                              | yes    | <b>Abl</b> , Lck, Itk SH2                                                        | yes                                | INSR kinase                  |

| Locus_tag    | Species                | Pos. | NetPhos2.0 prediction <sup>a</sup> |       | ScanSite prediction <sup>b</sup> |        |                                                                                             | KinasePhos prediction <sup>c</sup> |                         |
|--------------|------------------------|------|------------------------------------|-------|----------------------------------|--------|---------------------------------------------------------------------------------------------|------------------------------------|-------------------------|
|              |                        |      | Motif                              | Score | High                             | Medium | predicted kinase                                                                            | 100% specificity                   | predicted kinase        |
| BARRO_80017  | <i>B. rochalimae</i>   | 350  | FSDIYDTTD                          | 0.954 | no                               | yes    | Nck SH2                                                                                     | no                                 | -                       |
| BARRO_80017  | <i>B. rochalimae</i>   | 356  | TTDIYDNP                           | 0.964 | yes                              | yes    | <b>Abl</b> , Crk, <b>Nck</b> , Itk SH2                                                      | yes                                | Syk, INSR kinases       |
| BARRO_80017  | <i>B. rochalimae</i>   | 374  | EEDIYANYN                          | 0.993 | yes                              | yes    | <b>Fgr</b> , <b>Lck</b> , <b>Src</b> , Abl kinases, <b>Itk</b> , <b>Grb2 SH2</b>            | yes                                | Src, Syk, INSR kinases  |
| BARRO_80017  | <i>B. rochalimae</i>   | 393  | NKGEYSPTY                          | 0.973 | no                               | no     | -                                                                                           | yes                                | INSR kinase             |
| BARRO_80017  | <i>B. rochalimae</i>   | 397  | YSPTYNTTG                          | 0.938 | no                               | no     | -                                                                                           | yes                                | Syk kinase              |
| BARRO_80017  | <i>B. rochalimae</i>   | 403  | TTGIYENPD                          | 0.927 | yes                              | yes    | <b>Abl</b> , Lck, Itk SH2                                                                   | yes                                | INSR kinase             |
| BARRO_80017  | <i>B. rochalimae</i>   | 421  | EEDIYANYN                          | 0.993 | yes                              | yes    | <b>Fgr</b> , <b>Lck</b> , <b>Src</b> , Abl kinases, <b>Grb2</b> , <b>Itk SH2</b>            | yes                                | Src, Syk, INSR kinases  |
| BARRO_80017  | <i>B. rochalimae</i>   | 440  | NKGEYSPTY                          | 0.973 | no                               | no     | -                                                                                           | yes                                | INSR kinase             |
| BARRO_80017  | <i>B. rochalimae</i>   | 444  | YSPTYNTTG                          | 0.938 | no                               | no     | -                                                                                           | yes                                | Syk kinase              |
| BARRO_80017  | <i>B. rochalimae</i>   | 450  | TTGIYENPD                          | 0.927 | yes                              | yes    | <b>Abl</b> , Lck, Itk SH2                                                                   | yes                                | INSR kinase             |
| BARRO_80017  | <i>B. rochalimae</i>   | 468  | EENIYENYN                          | 0.99  | yes                              | yes    | <b>Src</b> , <b>Lck</b> , Fgr kinases, <b>Fgr</b> , Lck, <b>Grb2</b> , <b>Itk</b> , Shc SH2 | yes                                | Src, Syk, INSR kinases  |
| BARRO_80017  | <i>B. rochalimae</i>   | 675  | KENDYQTLA                          | 0.98  | no                               | no     | -                                                                                           | yes                                | Syk                     |
| BAR15_160030 | <i>B. sp. AR 15-3</i>  | 255  | DQNIYESYD                          | 0.866 | yes                              | yes    | <b>Src kinase</b>                                                                           | yes                                | Syk, INSR kinases       |
| BAR15_160030 | <i>B. sp. AR 15-3</i>  | 285  | IDSIYDNPS                          | 0.84  | yes                              | yes    | <b>Abl</b> , Crk, <b>Nck SH2</b>                                                            | yes                                | Syk, INSR kinases       |
| BAR15_160030 | <i>B. sp. AR 15-3</i>  | 296  | VDPVYANYT                          | 0.929 | yes                              | yes    | Abl, Lck kinases, <b>Grb2</b> , Itk SH2                                                     | no                                 | -                       |
| BAR15_160030 | <i>B. sp. AR 15-3</i>  | 323  | VDPVYDDPS                          | 0.928 | yes                              | yes    | Abl kinase, <b>Nck</b> , Abl, Crk SH2                                                       | yes                                | Syk kinases             |
| BAR15_160030 | <i>B. sp. AR 15-3</i>  | 340  | IDSIYDNPS                          | 0.84  | yes                              | yes    | <b>Abl</b> , Crk, <b>Nck SH2</b>                                                            | yes                                | Syk, INSR kinases       |
| BAR15_160030 | <i>B. sp. AR 15-3</i>  | 351  | VDPVYANYT                          | 0.929 | yes                              | yes    | Abl, Lck kinases, <b>Grb2</b> , Itk SH2                                                     | no                                 | -                       |
| BAR15_160030 | <i>B. sp. AR 15-3</i>  | 378  | IDPVYDDPS                          | 0.908 | yes                              | yes    | Abl kinase, <b>Nck</b> , Abl, Crk SH2                                                       | yes                                | Syk kinases             |
| BAR15_160030 | <i>B. sp. AR 15-3</i>  | 395  | IDSIYDNPS                          | 0.84  | yes                              | yes    | <b>Abl</b> , Crk, <b>Nck SH2</b>                                                            | yes                                | Syk, INSR kinases       |
| BAR15_160030 | <i>B. sp. AR 15-3</i>  | 406  | VDPVYANYT                          | 0.929 | yes                              | yes    | Abl, Lck kinases, <b>Grb2</b> , Itk SH2                                                     | no                                 | -                       |
| BAR15_160030 | <i>B. sp. AR 15-3</i>  | 433  | VDPVYDDPS                          | 0.928 | yes                              | yes    | Abl kinase, <b>Nck</b> , Abl, Crk SH2                                                       | yes                                | Syk kinase              |
| BAR15_160030 | <i>B. sp. AR 15-3</i>  | 450  | IDSIYDNPS                          | 0.84  | yes                              | yes    | <b>Abl</b> , Crk, <b>Nck SH2</b>                                                            | yes                                | Syk, INSR kinases       |
| BAR15_160030 | <i>B. sp. AR 15-3</i>  | 461  | VDPVYANYT                          | 0.929 | yes                              | yes    | Abl, Lck kinases, <b>Grb2</b> , Itk SH2                                                     | no                                 | -                       |
| BAR15_160030 | <i>B. sp. AR 15-3</i>  | 488  | IDPVYDDPS                          | 0.908 | yes                              | yes    | Abl kinase, <b>Nck</b> , Abl, Crk SH2                                                       | yes                                | Syk kinases             |
| BAR15_160030 | <i>B. sp. AR 15-3</i>  | 608  | KNPRYKQAK                          | 0.948 | no                               | no     | -                                                                                           | no                                 | -                       |
| BARCL_1034   | <i>B. clarridgeiae</i> | 14   | NSEIYENSE                          | 0.981 | no                               | yes    | Src kinase, Fgr SH2                                                                         | yes                                | Syk, EGFR, INSR kinases |
| BARCL_1034   | <i>B. clarridgeiae</i> | 20   | NSEIYDNPA                          | 0.983 | yes                              | yes    | <b>Abl</b> , <b>Nck SH2</b>                                                                 | yes                                | Syk, INSR kinases       |

| Locus_tag  | Species                | Pos. | NetPhos2.0 prediction <sup>a</sup> |       | ScanSite prediction <sup>b</sup> |        |                                              | KinasePhos prediction <sup>c</sup> |                         |
|------------|------------------------|------|------------------------------------|-------|----------------------------------|--------|----------------------------------------------|------------------------------------|-------------------------|
|            |                        |      | Motif                              | Score | High                             | Medium | predicted kinase                             | 100% specificity                   | predicted kinase        |
| BARCL_1034 | <i>B. clarridgeiae</i> | 30   | DSGIYDTPA                          | 0.891 | yes                              | yes    | <b>Abl kinase, Nck, Crk</b> , Abl SH2        | yes                                | Syk, INSR kinases       |
| BARCL_1034 | <i>B. clarridgeiae</i> | 40   | NSEIYDNPA                          | 0.983 | yes                              | yes    | Abl kinase, <b>Abl, Nck</b> , Crk, Itk SH2   | yes                                | Syk, INSR kinases       |
| BARCL_1034 | <i>B. clarridgeiae</i> | 50   | DSGIYDTPA                          | 0.891 | yes                              | yes    | <b>Abl kinase, Nck, Crk</b> , Abl SH2        | yes                                | Syk, INSR kinases       |
| BARCL_1034 | <i>B. clarridgeiae</i> | 60   | NSEIYGNPA                          | 0.978 | no                               | yes    | Abl, Src kinases, Abl, Itk SH2               | yes                                | INSR kinase             |
| BARCL_1034 | <i>B. clarridgeiae</i> | 70   | DSGIYDTPA                          | 0.891 | yes                              | yes    | <b>Abl kinase, Nck, Crk</b> , Abl SH2        | yes                                | Syk, INSR kinase        |
| BARCL_1034 | <i>B. clarridgeiae</i> | 80   | NSEIYENSE                          | 0.981 | no                               | yes    | Src kinase                                   | yes                                | Syk, EGFR, INSR kinases |
| BARCL_1034 | <i>B. clarridgeiae</i> | 86   | NSEIYGNPA                          | 0.978 | no                               | yes    | Abl kinase, Abl, Nck, Crk, Itk SH2           | yes                                | INSR kinase             |
| BARCL_1034 | <i>B. clarridgeiae</i> | 96   | DSGIYDTPA                          | 0.891 | yes                              | yes    | <b>Abl kinase, Nck, Crk</b> , Abl SH2        | yes                                | Syk, INSR kinases       |
| BARCL_1034 | <i>B. clarridgeiae</i> | 106  | NSEIYENSE                          | 0.981 | no                               | yes    | Src kinase                                   | yes                                | Syk, EGFR, INSR kinases |
| BARCL_1034 | <i>B. clarridgeiae</i> | 112  | NSEIYGNSA                          | 0.973 | no                               | yes    | Src kinase                                   | yes                                | INSR kinase             |
| BARCL_1034 | <i>B. clarridgeiae</i> | 122  | DSEIYENYD                          | 0.983 | yes                              | yes    | <b>Src, Lck, Fgr kinases, Grb2</b> , Fgr SH2 | yes                                | Syk, INSR kinases       |
| BARCL_1034 | <i>B. clarridgeiae</i> | 128  | NYDTYKKNK                          | 0.844 | no                               | no     | -                                            | no                                 | -                       |
| BARCL_1034 | <i>B. clarridgeiae</i> | 318  | RNNEYKLLA                          | 0.84  | no                               | no     | -                                            | no                                 | -                       |
| BARCL_1032 | <i>B. clarridgeiae</i> | 17   | QEVEYTEVH                          | 0.949 | no                               | yes    | Fyn, Lck, Src SH2                            | no                                 | -                       |
| BARCL_1032 | <i>B. clarridgeiae</i> | 42   | QEVEYAEIR                          | 0.962 | no                               | yes    | Lck kinase                                   | no                                 | -                       |
| BARCL_1035 | <i>B. clarridgeiae</i> | 16   | EEVEYAEVF                          | 0.971 | no                               | yes    | Src, Lck, INSR, PDFGR kinase, PLCg SH2       | yes                                | Syk, INSR kinases       |
| BARCL_1035 | <i>B. clarridgeiae</i> | 197  | SKPVYMLSR                          | 0.89  | no                               | yes    | PCLg SH2                                     | no                                 | -                       |

<sup>a</sup>For NetPhos2.0 predictions a threshold of 0.8 was used.

<sup>b</sup>Scansite was used with the high stringency and the medium stringency filter. Kinases depicted in bold type were predicted with high stringency filter.

<sup>c</sup>For KinasePhos predictions the 100% specificity filter was used.
