# Supplementary material
Source: PubMed Central journal article supplement (PMC3037411)
Supplement: pgen.1001296.s011.pdf [file pgen.1001296.s011.pdf]

**Table S5.** 454-sequencing and newbler-assembly data of the genomes sequenced in this study.

|                                                  | <i>B. clarridgeiae</i> | <i>B. rochalimae</i> | <i>B. sp. 1-1C</i> | <i>B. sp. AR 15-3</i> | <i>B. schoenbuchensis</i> |
|--------------------------------------------------|------------------------|----------------------|--------------------|-----------------------|---------------------------|
| <b>Final length (bp)</b>                         | 1,522,743              | 1,540,290            | 1,566,739          | 1,590,248             | 1,667,713                 |
| <b>Number of 454-reads</b>                       | 212,905                | 287,512              | 253,303            | 254,535               | 173,358                   |
| <b>Average read length (bp)</b>                  | 247                    | 211                  | 241                | 236                   | 285                       |
| <b>Number of Newbler contigs (&gt; one read)</b> | 43                     | 78                   | 74                 | 93                    | 220                       |
| <b>Number of contigs after manual assembly</b>   | 1                      | 13                   | 19                 | 17                    | 18                        |
| <b>454-sequence coverage</b>                     | 35x                    | 39x                  | 39x                | 37x                   | 29x                       |
