# Supplementary material
Source: PubMed Central journal article supplement (PMC3037411)

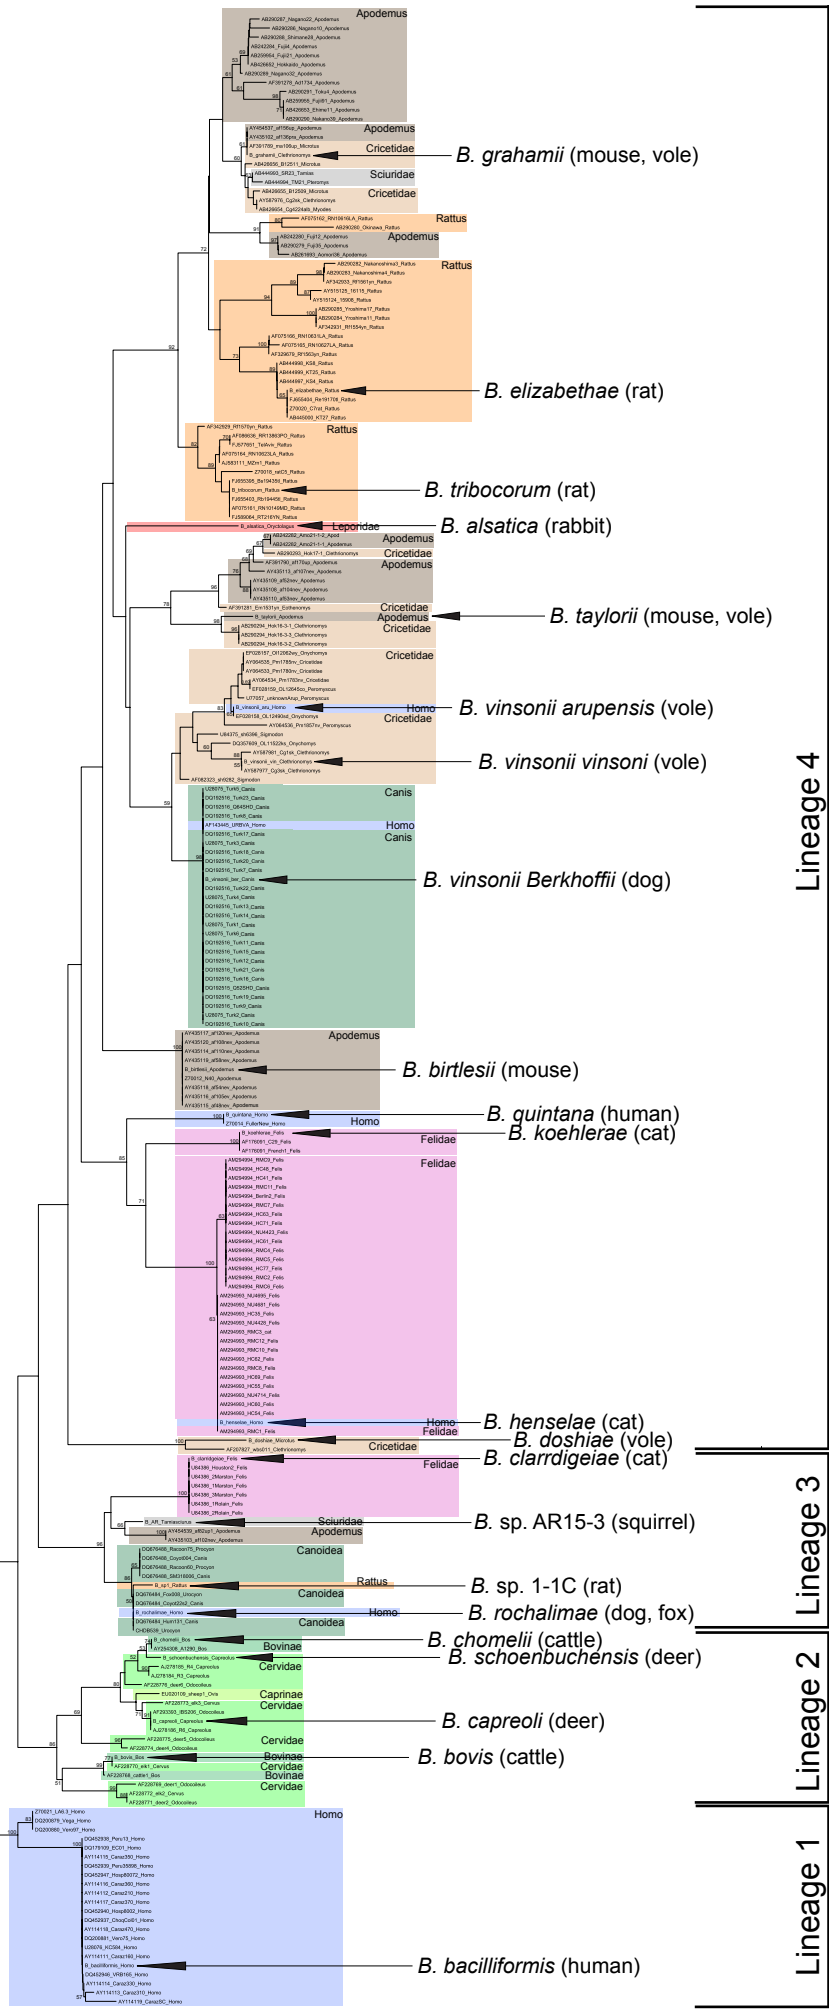

Supplement: pgen.1001296.s002.pdf [file pgen.1001296.s002.pdf]

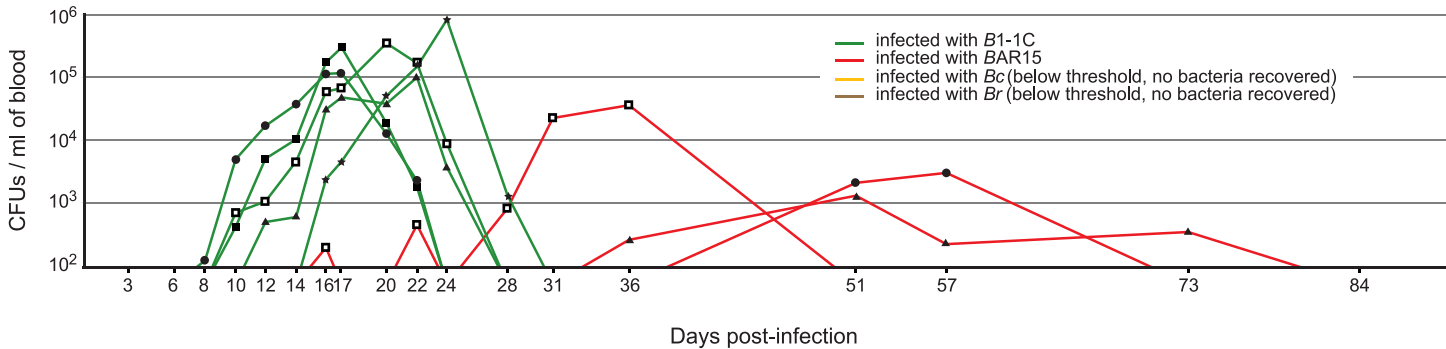

Supplement: pgen.1001296.s003.pdf [file pgen.1001296.s003.pdf]

**A**

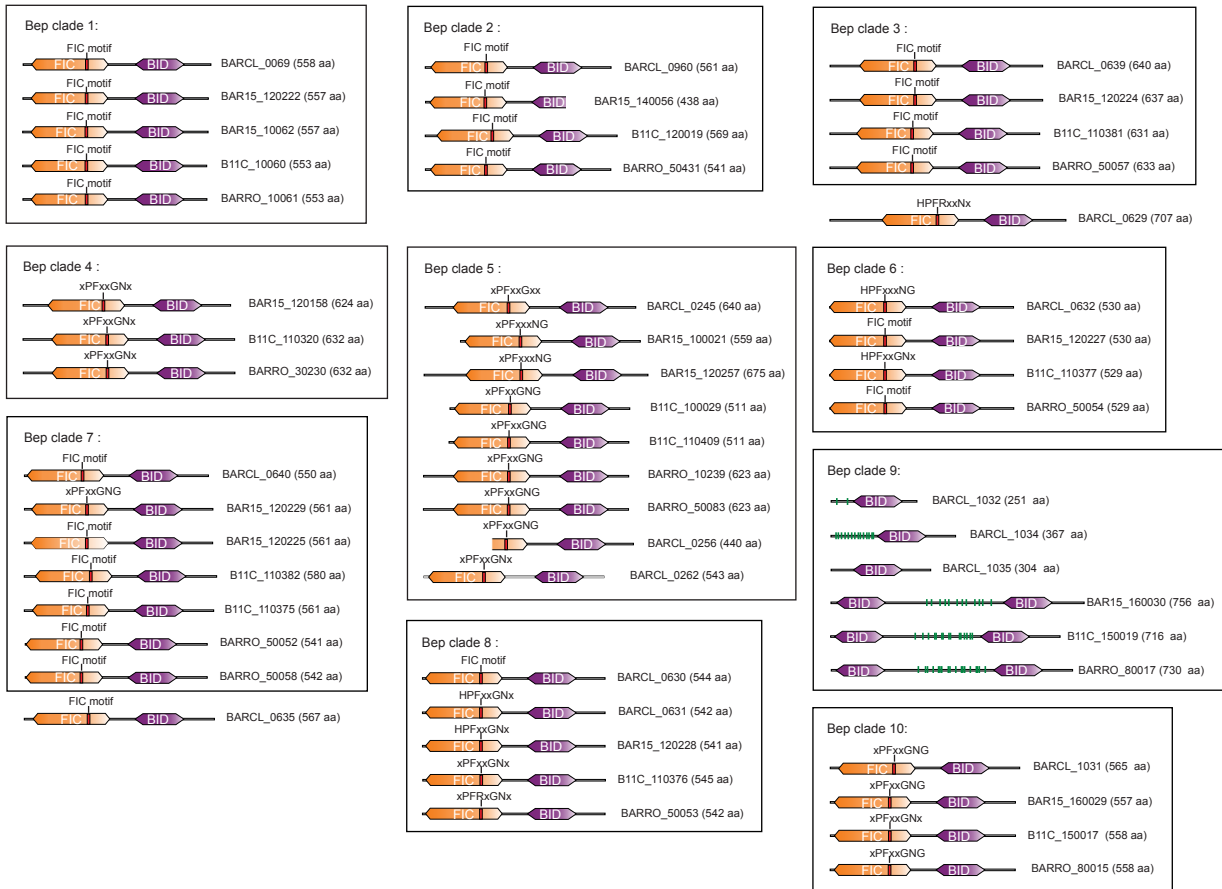

**B**

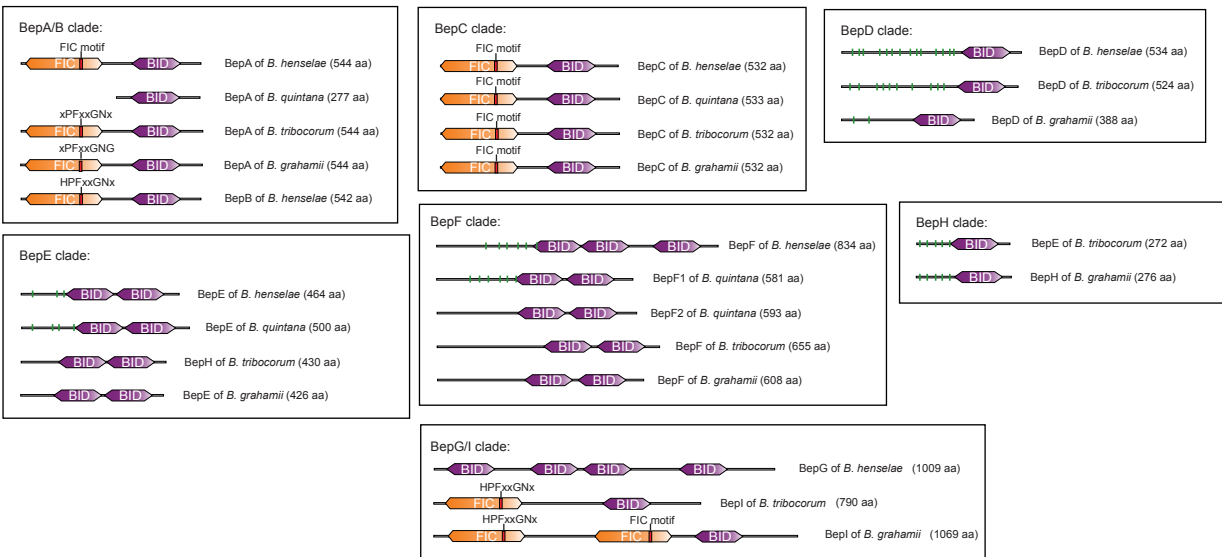

Supplement: pgen.1001296.s005.pdf [file pgen.1001296.s005.pdf]

A

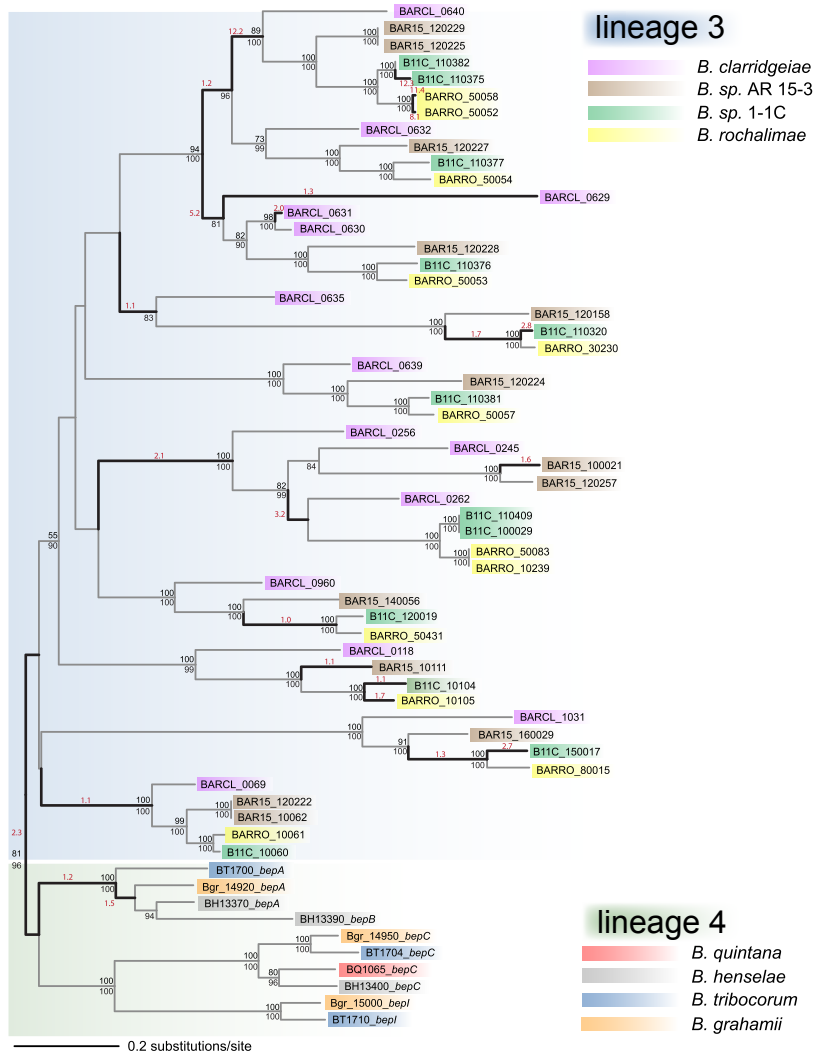

B

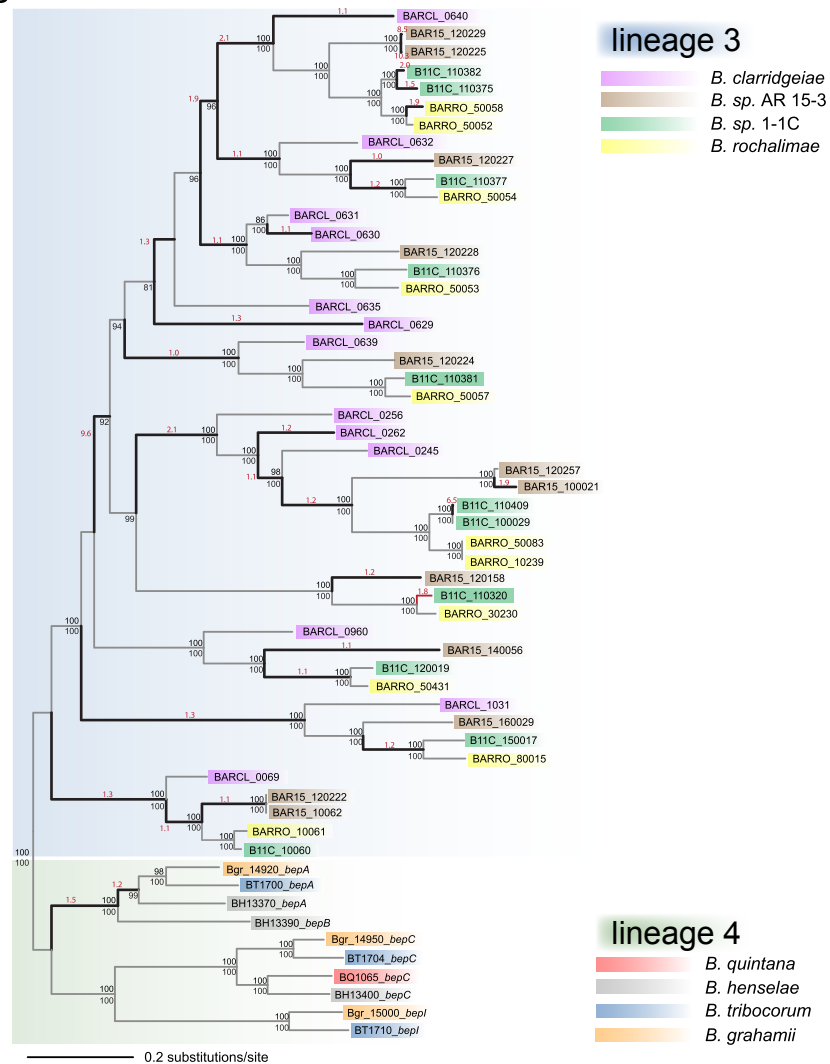

Supplement: pgen.1001296.s006.pdf [file pgen.1001296.s006.pdf]
